# Supplementary material for: Improving the performance of the MM/PBSA and MM/GBSA methods in recognizing the native structure of the Bcl-2 family using the interaction entropy method
Source: Royal Society of Chemistry journal article supplement (doi:10.1039/c9cp06459a), 2020-01-01
Supplement: c9cp06459a1.pdf [file c9cp06459a1.pdf]

## Supplementary Material

### Improving the Performance of the MM/PBSA and MM/GBSA Methods in Recognizing the Native Structure of the Bcl-2 Family using the Interaction Entropy Method

*Susu Zhong, Kaifang Huang, Song Luo, Shuheng Dong, Lili Duan\**

School of Physics and Electronics, Shandong Normal University, Jinan, 250014,  
China

Corresponding author ([duanll@sdu.edu.cn](mailto:duanll@sdu.edu.cn))

#### Table

**Table S1** The atom number of all 176 structures for MD simulation.

**Table S2** The standard parameters: true positive (TP), false positive (FP), false negative (FN), and true negative (TN).

**Table S3** The binding free energy calculated by PB<sub>IE</sub>, and GB<sup>HCT</sup><sub>IE</sub> methods for the native structure of 4AQ3 system (protein–ligand) and 10 decoy structures docked from Glide program. (All values are in kcal/mol)

**Table S4** The binding free energy calculated by the PB<sub>IE</sub>, and GB<sup>HCT</sup><sub>IE</sub> methods for the native structure of 2PON system (protein–protein) and 10 decoy structures docked from ZDOCK program. (All values are in kcal/mol)

**Table S5** The RMSD values of 100 decoys in 10 protein–ligand systems (4QVX, 2O21, 4LVT, 3ZLR, 3ZK6, 6O0K, 4AQ3, 6QGH, 6GL8, and 6O0O).

**Table S6** The RMSD values of 60 decoys in 6 protein–protein systems (4CIN, 1G5J, 2XA0, 3R85, 2PON, and 3PL7).

**Table S7** The calculated binding free energy based on the MD simulation with different restraint force constants of 5, 10, and 15 kcal·(mol·Å<sup>2</sup>)<sup>-1</sup> for the native structure of 4AQ3 system.

**Table S8** The calculated binding free energy based on the MD simulation with

different restraint force constants of 5, 10, and 15 kcal·(mol·Å<sup>2</sup>)<sup>-1</sup> for the native structure of 2PON system.

**Table S9** The binding free energy of the native structure of 4AQ3 system (protein–ligand) and 10 decoy structures generated from cluster analysis calculated by the PB, GB<sup>HCT</sup>, GB<sup>OBC1</sup>, GB<sup>OBC2</sup>, GB<sup>GBn1</sup>, GB<sup>GBn2</sup>, PB\_IE, GB<sup>HCT</sup>\_IE, GB<sup>OBC1</sup>\_IE, GB<sup>OBC2</sup>\_IE, GB<sup>GBn1</sup>\_IE, and GB<sup>GBn2</sup>\_IE methods. (All values are in kcal/mol)

**Table S10** The binding free energy of the native structure of 2PON system (protein–protein) and 10 decoy structures generated from cluster analysis calculated by the PB, GB<sup>HCT</sup>, GB<sup>OBC1</sup>, GB<sup>OBC2</sup>, GB<sup>GBn1</sup>, GB<sup>GBn2</sup>, PB\_IE, GB<sup>HCT</sup>\_IE, GB<sup>OBC1</sup>\_IE, GB<sup>OBC2</sup>\_IE, GB<sup>GBn1</sup>\_IE, and GB<sup>GBn2</sup>\_IE methods. (All values are in kcal/mol)

**Table S11** The binding free energy calculated by PB, GB<sup>HCT</sup>, and GB<sup>OBC1</sup> method and the entropic contribution added by IE, Nmode, and QH methods of all native and decoy structures of 4AQ3 system. (All values are in kcal/mol)

**Table S12** The binding free energy calculated by PB, GB<sup>HCT</sup>, and GB<sup>OBC1</sup> method and the entropic contribution added by IE, Nmode, and QH methods of all native and decoy structures of 2PON system. (All values are in kcal/mol)

**Table S13(A-P)** The binding free energy of the native structure and decoy structures generated from cluster analysis in 16 systems, calculated by the PB, GB<sup>HCT</sup>, GB<sup>OBC1</sup>, PB\_IE, GB<sup>HCT</sup>\_IE, and GB<sup>OBC1</sup>\_IE methods, respectively. (All values are in kcal/mol)

|             | <b>Native</b> | <b>Decoy1</b> | <b>Decoy2</b> | <b>Decoy3</b> | <b>Decoy4</b> | <b>Decoy5</b> | <b>Decoy6</b> | <b>Decoy7</b> | <b>Decoy8</b> | <b>Decoy9</b> | <b>Decoy10</b> |
|-------------|---------------|---------------|---------------|---------------|---------------|---------------|---------------|---------------|---------------|---------------|----------------|
| <b>4QVX</b> | 17487         | 18789         | 23157         | 19515         | 17919         | 19200         | 19665         | 19422         | 22320         | 17097         | 17919          |
| <b>2O21</b> | 24496         | 22138         | 23926         | 21172         | 23587         | 26353         | 22546         | 30163         | 23926         | 23974         | 20863          |
| <b>4LVT</b> | 18562         | 21367         | 19246         | 20701         | 21115         | 21112         | 21367         | 19246         | 20701         | 21115         | 21151          |
| <b>3ZLR</b> | 22047         | 21852         | 23022         | 18942         | 25530         | 20787         | 22191         | 22548         | 28848         | 19977         | 20703          |
| <b>3ZK6</b> | 17379         | 17223         | 19113         | 18834         | 17319         | 19686         | 18240         | 18678         | 18897         | 18945         | 21171          |
| <b>6O0K</b> | 20762         | 27659         | 21668         | 27575         | 22475         | 19484         | 19631         | 22307         | 20969         | 19598         | 26498          |
| <b>4AQ3</b> | 17650         | 20542         | 23104         | 23926         | 22132         | 19462         | 18811         | 20812         | 23992         | 23647         | 22798          |
| <b>6QGH</b> | 25276         | 24568         | 32800         | 27748         | 37522         | 39709         | 34684         | 24721         | 31126         | 42067         | 35578          |
| <b>6GL8</b> | 20831         | 18053         | 21809         | 18737         | 17084         | 19097         | 18236         | 18818         | 21884         | 18713         | 19430          |
| <b>6O0O</b> | 17117         | 20810         | 20612         | 17021         | 21299         | 19550         | 19157         | 20771         | 20924         | 18398         | 20612          |
| <b>4CIN</b> | 28851         | 26778         | 27474         | 31314         | 21564         | 27531         | 25683         | 29076         | 28161         | 28350         | 28818          |
| <b>1G5J</b> | 22128         | 27480         | 27597         | 33930         | 29994         | 30357         | 25545         | 26058         | 26724         | 23295         | 28398          |
| <b>2XA0</b> | 25797         | 22260         | 24861         | 29745         | 25557         | 29925         | 22272         | 16650         | 21378         | 26322         | 25773          |
| <b>3R85</b> | 31068         | 28695         | 27471         | 30339         | 43023         | 46428         | 50457         | 38316         | 54258         | 43851         | 49566          |
| <b>3PL7</b> | 22257         | 18240         | 17349         | 19944         | 17997         | 17850         | 21159         | 19587         | 19044         | 19620         | 18351          |
| <b>2PON</b> | 17031         | 19077         | 21087         | 22332         | 21423         | 24783         | 21120         | 19362         | 20835         | 21456         | 22122          |

Table S1

| Total population           | Native structure    | Decoy structure     |
|----------------------------|---------------------|---------------------|
| Predicted native structure | True positive (TP)  | False positive (FP) |
| Predicted decoy structure  | False negative (FN) | True negative (TN)  |

Table S2

| 4AQ3    |                       | $\Delta E_{\text{ele}}$ | $\Delta E_{\text{vdw}}$ | $\Delta G_{\text{np}}$ | $\Delta G_{\text{pb/gb}}$ | $\Delta H$ | $-T\Delta S$ | $\Delta G_{\text{bind}}$ |
|---------|-----------------------|-------------------------|-------------------------|------------------------|---------------------------|------------|--------------|--------------------------|
| Native  | PB_IE                 | -2.32                   | -64.97                  | -7.43                  | 27.82                     | -46.90     | 11.89        | -35.01                   |
|         | GB <sup>HCT</sup> _IE | -2.32                   | -64.97                  | -8.65                  | 19.06                     | -56.88     | 11.89        | -44.99                   |
| Decoy1  | PB_IE                 | -15.53                  | -42.10                  | -5.70                  | 40.95                     | -22.38     | 24.33        | 1.95                     |
|         | GB <sup>HCT</sup> _IE | -15.53                  | -42.10                  | -6.35                  | 31.68                     | -32.30     | 24.33        | -7.97                    |
| Decoy2  | PB_IE                 | -35.55                  | -49.22                  | -6.53                  | 59.80                     | -31.50     | 26.93        | -4.57                    |
|         | GB <sup>HCT</sup> _IE | -35.55                  | -49.22                  | -7.45                  | 48.13                     | -44.09     | 26.93        | -17.16                   |
| Decoy3  | PB_IE                 | -16.08                  | -35.18                  | -5.01                  | 33.12                     | -23.15     | 21.48        | -1.67                    |
|         | GB <sup>HCT</sup> _IE | -16.08                  | -35.18                  | -5.44                  | 30.36                     | -26.34     | 21.48        | -4.86                    |
| Decoy4  | PB_IE                 | -13.29                  | -43.90                  | -5.82                  | 37.73                     | -25.28     | 24.28        | -1.00                    |
|         | GB <sup>HCT</sup> _IE | -13.29                  | -43.90                  | -6.51                  | 32.12                     | -31.58     | 24.28        | -7.30                    |
| Decoy5  | PB_IE                 | -39.20                  | -38.91                  | -5.75                  | 63.28                     | -20.58     | 32.18        | 11.60                    |
|         | GB <sup>HCT</sup> _IE | -39.20                  | -38.91                  | -6.41                  | 52.56                     | -31.96     | 32.18        | 0.22                     |
| Decoy6  | PB_IE                 | -11.62                  | -36.16                  | -5.02                  | 28.84                     | -23.96     | 19.55        | -4.41                    |
|         | GB <sup>HCT</sup> _IE | -11.62                  | -36.16                  | -5.44                  | 24.59                     | -28.63     | 19.55        | -9.08                    |
| Decoy7  | PB_IE                 | -3.22                   | -30.85                  | -4.65                  | 23.89                     | -14.83     | 15.28        | 0.45                     |
|         | GB <sup>HCT</sup> _IE | -3.22                   | -30.85                  | -4.96                  | 19.83                     | -19.20     | 15.28        | -3.92                    |
| Decoy8  | PB_IE                 | -32.04                  | -44.63                  | -6.08                  | 51.75                     | -31.00     | 25.71        | -5.29                    |
|         | GB <sup>HCT</sup> _IE | -32.04                  | -44.63                  | -6.85                  | 43.19                     | -40.33     | 25.71        | -14.62                   |
| Decoy9  | PB_IE                 | -58.45                  | -43.80                  | -5.98                  | 73.72                     | -34.51     | 39.94        | 5.43                     |
|         | GB <sup>HCT</sup> _IE | -58.45                  | -43.80                  | -6.72                  | 66.03                     | -42.94     | 39.94        | -3.00                    |
| Decoy10 | PB_IE                 | 0.53                    | -38.54                  | -5.71                  | 20.17                     | -23.55     | 20.14        | -3.41                    |
|         | GB <sup>HCT</sup> _IE | 0.53                    | -38.54                  | -6.36                  | 14.97                     | -29.40     | 20.14        | -9.26                    |

Table S3

| <b>2PON</b>    |                            | $\Delta E_{\text{ele}}$ | $\Delta E_{\text{vdw}}$ | $\Delta G_{\text{np}}$ | $\Delta G_{\text{pb/gb}}$ | $\Delta H$ | $-T\Delta S$ | $\Delta G_{\text{bind}}$ |
|----------------|----------------------------|-------------------------|-------------------------|------------------------|---------------------------|------------|--------------|--------------------------|
| <b>Native</b>  | <b>PB_IE</b>               | -157.65                 | -103.46                 | -13.13                 | 185.92                    | -88.32     | 67.72        | -20.60                   |
|                | <b>GB<sup>HCT</sup>_IE</b> | -157.65                 | -103.46                 | -16.22                 | 172.78                    | -104.55    | 67.72        | -36.83                   |
| <b>Decoy1</b>  | <b>PB_IE</b>               | -9.14                   | -94.03                  | -12.42                 | 60.01                     | -55.58     | 75.89        | 20.31                    |
|                | <b>GB<sup>HCT</sup>_IE</b> | -9.14                   | -94.03                  | -15.27                 | 41.07                     | -77.37     | 75.89        | -1.48                    |
| <b>Decoy2</b>  | <b>PB_IE</b>               | -118.48                 | -75.08                  | -11.04                 | 138.68                    | -65.92     | 81.19        | 15.27                    |
|                | <b>GB<sup>HCT</sup>_IE</b> | -118.48                 | -75.08                  | -13.45                 | 127.71                    | -79.30     | 81.19        | 1.89                     |
| <b>Decoy3</b>  | <b>PB_IE</b>               | -3.52                   | -44.84                  | -7.54                  | 23.08                     | -32.82     | 42.29        | 9.47                     |
|                | <b>GB<sup>HCT</sup>_IE</b> | -3.52                   | -44.84                  | -8.79                  | 21.72                     | -35.43     | 42.29        | 6.86                     |
| <b>Decoy4</b>  | <b>PB_IE</b>               | -107.57                 | -22.92                  | -5.42                  | 113.50                    | -22.41     | 110.34       | 87.93                    |
|                | <b>GB<sup>HCT</sup>_IE</b> | -107.57                 | -22.92                  | -5.98                  | 117.02                    | -19.45     | 110.34       | 90.87                    |
| <b>Decoy5</b>  | <b>PB_IE</b>               | -151.96                 | -37.42                  | -7.99                  | 167.44                    | -29.93     | 75.93        | 46.00                    |
|                | <b>GB<sup>HCT</sup>_IE</b> | -151.96                 | -37.42                  | -9.39                  | 158.99                    | -39.78     | 75.93        | 36.15                    |
| <b>Decoy6</b>  | <b>PB_IE</b>               | 23.62                   | -48.09                  | -7.66                  | 8.05                      | -24.08     | 37.94        | 28.98                    |
|                | <b>GB<sup>HCT</sup>_IE</b> | 23.62                   | -48.09                  | -8.96                  | -3.19                     | -36.62     | 37.94        | 1.32                     |
| <b>Decoy7</b>  | <b>PB_IE</b>               | 4.79                    | -42.89                  | -7.42                  | 29.78                     | -15.74     | 89.00        | 73.26                    |
|                | <b>GB<sup>HCT</sup>_IE</b> | 4.79                    | -42.89                  | -8.64                  | 21.48                     | -25.26     | 89.00        | 63.74                    |
| <b>Decoy8</b>  | <b>PB_IE</b>               | -6.58                   | -42.54                  | -7.40                  | 33.19                     | -23.33     | 52.89        | 29.56                    |
|                | <b>GB<sup>HCT</sup>_IE</b> | -6.58                   | -42.54                  | -8.61                  | 27.46                     | -30.27     | 52.89        | 22.62                    |
| <b>Decoy9</b>  | <b>PB_IE</b>               | 106.52                  | -52.83                  | -7.36                  | -78.45                    | -32.12     | 218.43       | 186.31                   |
|                | <b>GB<sup>HCT</sup>_IE</b> | 106.52                  | -52.83                  | -8.56                  | -82.75                    | -37.62     | 218.43       | 180.81                   |
| <b>Decoy10</b> | <b>PB_IE</b>               | -86.70                  | -69.95                  | -9.73                  | 119.39                    | -46.99     | 47.87        | 0.88                     |
|                | <b>GB<sup>HCT</sup>_IE</b> | -86.70                  | -69.95                  | -11.71                 | 104.46                    | -63.90     | 47.87        | -16.03                   |

Table S4

| <b>Protein-Ligand</b> | <b>4QVX</b> | <b>2O21</b> | <b>4LVT</b> | <b>3ZLR</b> | <b>3ZK6</b> | <b>6O0K</b> | <b>4AQ3</b> | <b>6QGH</b> | <b>6GL8</b> | <b>6O0O</b> |
|-----------------------|-------------|-------------|-------------|-------------|-------------|-------------|-------------|-------------|-------------|-------------|
| <b>Decoy1</b>         | 3.60        | 3.19        | 3.80        | 4.53        | 0.94        | 3.85        | 3.92        | 2.29        | 4.62        | 3.94        |
| <b>Decoy2</b>         | 3.70        | 2.51        | 1.41        | 5.10        | 2.48        | 3.19        | 3.94        | 7.18        | 3.58        | 2.81        |
| <b>Decoy3</b>         | 3.00        | 3.00        | 3.21        | 4.11        | 3.28        | 3.35        | 4.56        | 5.82        | 3.34        | 3.64        |
| <b>Decoy4</b>         | 1.96        | 2.68        | 3.05        | 1.45        | 3.52        | 3.48        | 3.79        | 5.53        | 3.59        | 3.73        |
| <b>Decoy5</b>         | 3.57        | 2.76        | 2.88        | 4.13        | 1.92        | 3.20        | 4.07        | 5.78        | 3.97        | 4.31        |
| <b>Decoy6</b>         | 3.37        | 3.13        | 3.81        | 2.07        | 2.71        | 2.38        | 2.63        | 6.13        | 2.46        | 1.31        |
| <b>Decoy7</b>         | 3.19        | 2.81        | 1.38        | 4.78        | 3.05        | 3.29        | 3.49        | 5.81        | 3.74        | 4.32        |
| <b>Decoy8</b>         | 3.14        | 2.47        | 3.22        | 2.82        | 3.48        | 2.97        | 3.93        | 4.05        | 3.91        | 3.48        |
| <b>Decoy9</b>         | 3.38        | 2.00        | 2.94        | 3.86        | 3.63        | 2.92        | 4.19        | 5.32        | 3.38        | 3.47        |
| <b>Decoy10</b>        | 3.01        | 2.65        | 3.42        | 2.37        | 3.46        | 3.62        | 4.43        | 5.35        | 3.52        | 3.64        |

Table S5

| <b>Protein-Protein</b> | <b>4CIN</b> | <b>1G5J</b> | <b>2XA0</b> | <b>3R85</b> | <b>2PON</b> | <b>3PL7</b> |
|------------------------|-------------|-------------|-------------|-------------|-------------|-------------|
| <b>Decoy1</b>          | 1.83        | 2.98        | 4.87        | 1.19        | 2.52        | 1.96        |
| <b>Decoy2</b>          | 4.97        | 3.87        | 1.41        | 3.67        | 3.05        | 2.82        |
| <b>Decoy3</b>          | 1.73        | 3.13        | 2.52        | 5.96        | 2.87        | 1.78        |
| <b>Decoy4</b>          | 2.62        | 2.72        | 3.16        | 4.87        | 2.90        | 7.73        |
| <b>Decoy5</b>          | 3.72        | 3.67        | 3.58        | 5.27        | 2.31        | 1.84        |
| <b>Decoy6</b>          | 4.78        | 1.79        | 4.88        | 4.60        | 2.77        | 5.70        |
| <b>Decoy7</b>          | 2.77        | 3.98        | 4.94        | 4.62        | 4.18        | 1.90        |
| <b>Decoy8</b>          | 3.82        | 4.05        | 4.24        | 2.31        | 4.83        | 6.04        |
| <b>Decoy9</b>          | 4.90        | 1.62        | 2.77        | 4.99        | 5.11        | 5.30        |
| <b>Decoy10</b>         | 2.01        | 3.64        | 2.79        | 4.21        | 4.42        | 2.85        |

Table S6

| <b>4AQ3</b> |                            | $\Delta E_{\text{ele}}$ | $\Delta E_{\text{vdw}}$ | $\Delta G_{\text{np}}$ | $\Delta G_{\text{pb/gb}}$ | $\Delta H$ | $-T\Delta S$ | $\Delta G_{\text{bind}}$ |
|-------------|----------------------------|-------------------------|-------------------------|------------------------|---------------------------|------------|--------------|--------------------------|
| <b>5</b>    | <b>PB_IE</b>               | -5.22                   | -63.31                  | -7.39                  | 33.16                     | -42.75     | 13.38        | -29.37                   |
|             | <b>GB<sup>HCT</sup>_IE</b> | -5.22                   | -63.31                  | -8.60                  | 23.22                     | -53.91     | 13.38        | -40.53                   |
| <b>10</b>   | <b>PB_IE</b>               | -6.32                   | -62.25                  | -7.28                  | 32.89                     | -46.91     | 11.89        | -35.02                   |
|             | <b>GB<sup>HCT</sup>_IE</b> | -6.32                   | -62.25                  | -8.45                  | 23.34                     | -56.89     | 11.89        | -45.00                   |
| <b>15</b>   | <b>PB_IE</b>               | -5.41                   | -62.16                  | -7.35                  | 32.81                     | -42.11     | 19.09        | -23.02                   |
|             | <b>GB<sup>HCT</sup>_IE</b> | -5.41                   | -62.16                  | -8.54                  | 23.18                     | -52.93     | 19.09        | -33.84                   |

Table S7

| <b>2PON</b> |                            | $\Delta E_{\text{ele}}$ | $\Delta E_{\text{vdw}}$ | $\Delta G_{\text{np}}$ | $\Delta G_{\text{pb/gb}}$ | $\Delta H$ | $-T\Delta S$ | $\Delta G_{\text{bind}}$ |
|-------------|----------------------------|-------------------------|-------------------------|------------------------|---------------------------|------------|--------------|--------------------------|
| <b>5</b>    | <b>PB_IE</b>               | -117.80                 | -110.36                 | -13.26                 | 158.55                    | -82.87     | 89.16        | 6.29                     |
|             | <b>GB<sup>HCT</sup>_IE</b> | -117.80                 | -110.36                 | -16.39                 | 143.34                    | -101.21    | 89.16        | -12.05                   |
| <b>10</b>   | <b>PB_IE</b>               | -116.89                 | -105.77                 | -13.18                 | 151.52                    | -88.32     | 67.72        | -20.60                   |
|             | <b>GB<sup>HCT</sup>_IE</b> | -116.89                 | -105.77                 | -16.29                 | 138.94                    | -104.55    | 67.72        | -36.83                   |
| <b>15</b>   | <b>PB_IE</b>               | -104.10                 | -108.67                 | -13.65                 | 142.46                    | -83.95     | 81.91        | -2.04                    |
|             | <b>GB<sup>HCT</sup>_IE</b> | -104.10                 | -108.67                 | -16.91                 | 127.27                    | -102.41    | 81.91        | -20.50                   |

Table S8

| <b>4AQ3</b>    | <b>PB</b> | <b>GB<sup>HCT</sup></b> | <b>GB<sup>OBC1</sup></b> | <b>GB<sup>OBC2</sup></b> | <b>GB<sup>GBn1</sup></b> | <b>GB<sup>GBn2</sup></b> | <b>PB<sub>IE</sub></b> | <b>GB<sup>HCT</sup><sub>IE</sub></b> | <b>GB<sup>OBC1</sup><sub>IE</sub></b> | <b>GB<sup>OBC2</sup><sub>IE</sub></b> | <b>GB<sup>GBn1</sup><sub>IE</sub></b> | <b>GB<sup>GBn2</sup><sub>IE</sub></b> |
|----------------|-----------|-------------------------|--------------------------|--------------------------|--------------------------|--------------------------|------------------------|--------------------------------------|---------------------------------------|---------------------------------------|---------------------------------------|---------------------------------------|
| <b>Native</b>  | -46.90    | -56.88                  | -51.18                   | -74.94                   | -69.71                   | -470.69                  | -35.01                 | -44.99                               | -39.29                                | -63.05                                | -57.82                                | -458.80                               |
| <b>Decoy1</b>  | -45.26    | -52.10                  | -47.19                   | -66.68                   | -67.03                   | -249.34                  | -32.30                 | -39.14                               | -34.23                                | -53.72                                | -54.07                                | -236.38                               |
| <b>Decoy2</b>  | -40.73    | -49.74                  | -43.73                   | -61.66                   | -48.40                   | -370.42                  | -25.34                 | -34.35                               | -28.34                                | -46.27                                | -33.01                                | -355.03                               |
| <b>Decoy3</b>  | -47.86    | -56.33                  | -50.04                   | -77.56                   | -74.95                   | -436.71                  | -30.32                 | -38.79                               | -32.50                                | -60.02                                | -57.41                                | -419.17                               |
| <b>Decoy4</b>  | -45.37    | -53.09                  | -46.88                   | -72.62                   | -65.75                   | -462.43                  | -32.08                 | -39.80                               | -33.59                                | -59.33                                | -52.46                                | -449.14                               |
| <b>Decoy5</b>  | -44.32    | -52.22                  | -46.08                   | -72.63                   | -73.30                   | -463.20                  | -27.94                 | -35.84                               | -29.70                                | -56.25                                | -56.92                                | -446.82                               |
| <b>Decoy6</b>  | -46.27    | -58.14                  | -51.83                   | -75.92                   | -72.14                   | -370.99                  | -28.10                 | -39.97                               | -33.66                                | -57.75                                | -53.97                                | -352.82                               |
| <b>Decoy7</b>  | -51.44    | -60.00                  | -53.20                   | -80.43                   | -10.52                   | -629.00                  | -36.57                 | -45.13                               | -38.33                                | -65.56                                | -52.64                                | -614.13                               |
| <b>Decoy8</b>  | -40.79    | -47.70                  | -41.99                   | -63.03                   | -58.74                   | -251.73                  | -27.26                 | -34.17                               | -28.46                                | -49.50                                | -45.21                                | -238.20                               |
| <b>Decoy9</b>  | -47.10    | -54.52                  | -48.70                   | -66.22                   | -63.24                   | -369.04                  | -35.09                 | -42.51                               | -36.69                                | -54.21                                | -51.23                                | -357.03                               |
| <b>Decoy10</b> | -45.00    | -53.33                  | -46.76                   | -77.23                   | -69.76                   | -486.98                  | -28.62                 | -36.95                               | -30.38                                | -60.85                                | -53.38                                | -470.60                               |

Table S9

| <b>2PON</b>    | <b>PB</b> | <b>GB<sup>HCT</sup></b> | <b>GB<sup>OBC1</sup></b> | <b>GB<sup>OBC2</sup></b> | <b>GB<sup>GBn1</sup></b> | <b>GB<sup>GBn2</sup></b> | <b>PB<sub>IE</sub></b> | <b>GB<sup>HCT</sup><sub>IE</sub></b> | <b>GB<sup>OBC1</sup><sub>IE</sub></b> | <b>GB<sup>OBC2</sup><sub>IE</sub></b> | <b>GB<sup>GBn1</sup><sub>IE</sub></b> | <b>GB<sup>GBn2</sup><sub>IE</sub></b> |
|----------------|-----------|-------------------------|--------------------------|--------------------------|--------------------------|--------------------------|------------------------|--------------------------------------|---------------------------------------|---------------------------------------|---------------------------------------|---------------------------------------|
| <b>Native</b>  | -88.32    | -104.55                 | -85.87                   | -19.98                   | -157.59                  | -1161.72                 | -20.60                 | -36.83                               | -18.15                                | 47.74                                 | -89.87                                | -1094.00                              |
| <b>Decoy1</b>  | -88.28    | -104.80                 | -84.55                   | -9.66                    | -76.77                   | -837.43                  | -19.52                 | -36.04                               | -15.79                                | 59.11                                 | -8.01                                 | -768.67                               |
| <b>Decoy2</b>  | -115.55   | -140.13                 | -113.71                  | -11.87                   | -166.67                  | -858.61                  | -26.50                 | -51.08                               | -24.66                                | 77.18                                 | -77.62                                | -115.55                               |
| <b>Decoy3</b>  | -98.96    | -122.35                 | -99.65                   | -6.57                    | -121.35                  | -1042.74                 | -10.39                 | -33.78                               | -11.08                                | 82.00                                 | -32.78                                | -954.17                               |
| <b>Decoy4</b>  | -104.31   | -125.49                 | -105.39                  | -25.44                   | -132.49                  | -1167.53                 | -6.25                  | -27.43                               | -7.33                                 | 72.62                                 | -34.43                                | -1069.47                              |
| <b>Decoy5</b>  | -80.71    | -104.00                 | -82.10                   | 19.67                    | -42.87                   | -1119.52                 | -5.85                  | -29.14                               | -7.24                                 | 94.53                                 | 31.99                                 | -1044.66                              |
| <b>Decoy6</b>  | -84.35    | -115.09                 | -93.95                   | -7.31                    | -125.14                  | -797.66                  | -5.69                  | -36.43                               | -15.29                                | 71.35                                 | -46.48                                | -719.00                               |
| <b>Decoy7</b>  | -84.56    | -100.80                 | -73.92                   | 21.97                    | -10.52                   | -1029.33                 | -18.99                 | -35.23                               | -8.35                                 | 87.54                                 | 55.05                                 | -963.76                               |
| <b>Decoy8</b>  | -81.22    | -95.03                  | -79.12                   | -4.45                    | -11.70                   | -872.61                  | -6.58                  | -20.39                               | -4.48                                 | 70.19                                 | 62.94                                 | -797.97                               |
| <b>Decoy9</b>  | -68.97    | -86.58                  | -68.29                   | 18.79                    | 0.13                     | -803.34                  | -12.47                 | -30.08                               | -11.79                                | 75.30                                 | 56.64                                 | -746.84                               |
| <b>Decoy10</b> | -89.89    | -99.97                  | -77.90                   | -29.58                   | -92.60                   | -1053.25                 | -21.40                 | -31.48                               | -9.41                                 | 38.91                                 | -24.11                                | -984.76                               |

Table S10

| 4AQ3           | PB     | GB <sup>HCT</sup> | GB <sup>OBC1</sup> | PB_IE  | GB <sup>HCT</sup> _IE | GB <sup>OBC1</sup> _IE | PB_Nmode | GB <sup>HCT</sup> _Nmode | GB <sup>OBC1</sup> _Nmode | PB_QH  | GB <sup>HCT</sup> _QH | GB <sup>OBC1</sup> _QH |
|----------------|--------|-------------------|--------------------|--------|-----------------------|------------------------|----------|--------------------------|---------------------------|--------|-----------------------|------------------------|
| <b>Native</b>  | -46.90 | -56.88            | -51.18             | -35.01 | -44.99                | -39.29                 | -15.88   | -25.86                   | -20.16                    | -16.48 | -26.46                | -20.76                 |
| <b>Decoy1</b>  | -45.26 | -52.10            | -47.19             | -32.30 | -39.14                | -34.23                 | -17.13   | -23.97                   | -19.06                    | -15.19 | -22.03                | -17.12                 |
| <b>Decoy2</b>  | -40.73 | -49.74            | -43.73             | -25.34 | -34.35                | -28.34                 | -11.07   | -20.08                   | -14.07                    | -10.01 | -19.02                | -13.01                 |
| <b>Decoy3</b>  | -47.86 | -56.33            | -50.04             | -30.32 | -38.79                | -32.50                 | -17.96   | -26.43                   | -20.14                    | -18.60 | -27.07                | -20.78                 |
| <b>Decoy4</b>  | -45.37 | -53.09            | -46.88             | -32.08 | -39.80                | -33.59                 | -14.82   | -22.54                   | -16.33                    | -15.13 | -22.85                | -16.64                 |
| <b>Decoy5</b>  | -44.32 | -52.22            | -46.08             | -27.94 | -35.84                | -29.70                 | -12.69   | -20.59                   | -14.45                    | -14.21 | -22.11                | -15.97                 |
| <b>Decoy6</b>  | -46.27 | -58.14            | -51.83             | -28.10 | -39.97                | -33.66                 | -16.52   | -28.39                   | -22.08                    | -17.21 | -29.08                | -22.77                 |
| <b>Decoy7</b>  | -51.44 | -60.00            | -53.20             | -36.57 | -45.13                | -38.33                 | -21.19   | -29.75                   | -22.95                    | -20.87 | -29.43                | -22.63                 |
| <b>Decoy8</b>  | -40.79 | -47.70            | -41.99             | -27.26 | -34.17                | -28.46                 | -13.40   | -20.31                   | -14.60                    | -13.79 | -20.70                | -14.99                 |
| <b>Decoy9</b>  | -47.10 | -54.52            | -48.70             | -35.09 | -42.51                | -36.69                 | -15.68   | -23.10                   | -17.28                    | -17.19 | -24.61                | -18.79                 |
| <b>Decoy10</b> | -45.00 | -53.33            | -46.76             | -28.62 | -36.95                | -30.38                 | -11.34   | -19.67                   | -13.10                    | -13.94 | -22.27                | -15.70                 |
| <b>Rank</b>    | 4      | 3                 | 3                  | 3      | 2                     | 1                      | 5        | 4                        | 3                         | 5      | 4                     | 4                      |

Table S11

| 2PON           | PB      | GB <sup>HCT</sup> | GB <sup>OBC1</sup> | PB_IE  | GB <sup>HCT</sup> _IE | GB <sup>OBC1</sup> _IE | PB_Nmode | GB <sup>HCT</sup> _Nmode | GB <sup>OBC1</sup> _Nmode | PB_QH  | GB <sup>HCT</sup> _QH | GB <sup>OBC1</sup> _QH |
|----------------|---------|-------------------|--------------------|--------|-----------------------|------------------------|----------|--------------------------|---------------------------|--------|-----------------------|------------------------|
| <b>Native</b>  | -88.32  | -104.55           | -85.87             | -20.60 | -36.83                | -18.15                 | -31.97   | -51.96                   | -33.28                    | -43.33 | -59.56                | -40.88                 |
| <b>Decoy1</b>  | -88.28  | -104.80           | -84.55             | -19.52 | -36.04                | -15.79                 | -29.17   | -44.47                   | -24.22                    | -33.70 | -50.22                | -29.97                 |
| <b>Decoy2</b>  | -115.55 | -140.13           | -113.71            | -26.50 | -51.08                | -24.66                 | -59.69   | -85.27                   | -58.85                    | -57.46 | -82.04                | -55.62                 |
| <b>Decoy3</b>  | -98.96  | -122.35           | -99.65             | -10.39 | -33.78                | -11.08                 | -34.89   | -60.66                   | -37.96                    | -44.7  | -68.09                | -45.39                 |
| <b>Decoy4</b>  | -104.31 | -125.49           | -105.39            | -6.25  | -27.43                | -7.33                  | -40.27   | -64.67                   | -44.57                    | -45.9  | -67.08                | -46.98                 |
| <b>Decoy5</b>  | -80.71  | -104.00           | -82.10             | -5.85  | -29.14                | -7.24                  | -39.42   | -58.00                   | -36.10                    | -33.26 | -56.55                | -34.65                 |
| <b>Decoy6</b>  | -84.35  | -115.09           | -93.95             | -5.69  | -36.43                | -15.29                 | -26.76   | -61.09                   | -39.95                    | -34.78 | -65.52                | -44.38                 |
| <b>Decoy7</b>  | -84.56  | -100.80           | -73.92             | -18.99 | -35.23                | -8.35                  | -29.89   | -51.59                   | -24.71                    | -32.46 | -48.70                | -21.82                 |
| <b>Decoy8</b>  | -81.22  | -95.03            | -79.12             | -6.58  | -20.39                | -4.48                  | -32.08   | -39.15                   | -23.24                    | -26.88 | -40.69                | -24.78                 |
| <b>Decoy9</b>  | -68.97  | -86.58            | -68.29             | -12.47 | -30.08                | -11.79                 | -7.93    | -28.52                   | -10.23                    | -25.82 | -43.43                | -25.14                 |
| <b>Decoy10</b> | -89.89  | -99.97            | -77.90             | -21.40 | -31.48                | -9.41                  | -51.90   | -62.68                   | -40.61                    | -48.00 | -58.08                | -36.01                 |
| <b>Rank</b>    | 5       | 6                 | 5                  | 3      | 2                     | 2                      | 7        | 7                        | 7                         | 6      | 5                     | 5                      |

Table S12



| <b>4QVX</b>    | <b>PB</b> | <b>GB<sup>HCT</sup></b> | <b>GB<sup>OBC1</sup></b> | <b>PB_IE</b> | <b>GB<sup>HCT</sup>_IE</b> | <b>GB<sup>OBC1</sup>_IE</b> |
|----------------|-----------|-------------------------|--------------------------|--------------|----------------------------|-----------------------------|
| <b>Native</b>  | -69.45    | -86.50                  | -77.46                   | -25.06       | -42.11                     | -33.07                      |
| <b>Decoy1</b>  | -67.74    | -82.90                  | -73.59                   | -24.47       | -39.63                     | -30.32                      |
| <b>Decoy2</b>  | -69.84    | -80.59                  | -71.62                   | -10.60       | -21.35                     | -12.38                      |
| <b>Decoy3</b>  | -64.16    | -79.83                  | -71.53                   | -4.50        | -20.17                     | -11.87                      |
| <b>Decoy4</b>  | -69.02    | -85.62                  | -76.21                   | -21.75       | -38.35                     | -28.94                      |
| <b>Decoy5</b>  | -62.59    | -80.77                  | -71.88                   | -21.09       | -39.27                     | -30.38                      |
| <b>Decoy6</b>  | -59.15    | -74.97                  | -65.92                   | -3.45        | -19.27                     | -10.22                      |
| <b>Decoy7</b>  | -66.22    | -82.92                  | -73.02                   | -14.41       | -31.11                     | -21.21                      |
| <b>Decoy8</b>  | -67.68    | -86.82                  | -70.40                   | -22.17       | -41.31                     | -23.94                      |
| <b>Decoy9</b>  | -64.85    | -79.57                  | -76.69                   | -18.39       | -33.11                     | -31.18                      |
| <b>Decoy10</b> | -69.20    | -84.99                  | -75.02                   | -13.93       | -29.72                     | -19.75                      |
| <b>Rank</b>    | 2         | 2                       | 1                        | 1            | 1                          | 1                           |

Table S13(A)

| <b>2O21</b>    | <b>PB</b> | <b>GB<sup>HCT</sup></b> | <b>GB<sup>OBC1</sup></b> | <b>PB_IE</b> | <b>GB<sup>HCT</sup>_IE</b> | <b>GB<sup>OBC1</sup>_IE</b> |
|----------------|-----------|-------------------------|--------------------------|--------------|----------------------------|-----------------------------|
| <b>native</b>  | -34.81    | -47.10                  | -39.82                   | -12.78       | -25.07                     | -17.79                      |
| <b>decoy1</b>  | -34.73    | -42.05                  | -35.61                   | -8.68        | -16.00                     | -9.56                       |
| <b>decoy2</b>  | -33.20    | -47.79                  | -40.18                   | -9.54        | -24.13                     | -16.52                      |
| <b>decoy3</b>  | -42.13    | -65.58                  | -56.13                   | -1.48        | -24.93                     | -15.48                      |
| <b>decoy4</b>  | -37.19    | -44.30                  | -37.92                   | -13.12       | -20.23                     | -13.85                      |
| <b>decoy5</b>  | -28.91    | -42.67                  | -37.09                   | -3.54        | -17.30                     | -11.72                      |
| <b>decoy6</b>  | -42.55    | -59.03                  | -55.60                   | -6.10        | -22.58                     | -19.15                      |
| <b>decoy7</b>  | -35.76    | -48.58                  | -41.88                   | -9.85        | -22.67                     | -15.97                      |
| <b>decoy8</b>  | -33.69    | -48.81                  | -40.77                   | -8.78        | -23.90                     | -15.86                      |
| <b>decoy9</b>  | -36.58    | -45.61                  | -37.77                   | -2.75        | -11.78                     | -3.94                       |
| <b>decoy10</b> | -28.47    | -37.27                  | -31.54                   | -6.87        | -15.67                     | -9.94                       |
| <b>Rank</b>    | 6         | 6                       | 6                        | 2            | 1                          | 2                           |

Table S13(B)

| <b>4LVT</b>    | <b>PB</b> | <b>GB<sup>HCT</sup></b> | <b>GB<sup>OBC1</sup></b> | <b>PB_IE</b> | <b>GB<sup>HCT</sup>_IE</b> | <b>GB<sup>OBC1</sup>_IE</b> |
|----------------|-----------|-------------------------|--------------------------|--------------|----------------------------|-----------------------------|
| <b>Native</b>  | -56.24    | -75.33                  | -66.13                   | -25.32       | -44.41                     | -35.21                      |
| <b>Decoy1</b>  | -43.11    | -49.75                  | -43.56                   | -16.51       | -23.15                     | -16.96                      |
| <b>Decoy2</b>  | -56.29    | -71.10                  | -62.71                   | -17.55       | -32.36                     | -23.97                      |
| <b>Decoy3</b>  | -50.85    | -66.24                  | -55.59                   | -11.06       | -26.45                     | -15.80                      |
| <b>Decoy4</b>  | -52.07    | -66.48                  | -55.82                   | -9.06        | -23.47                     | -12.81                      |
| <b>Decoy5</b>  | -52.63    | -67.38                  | -56.57                   | -21.71       | -36.46                     | -25.65                      |
| <b>Decoy6</b>  | -44.08    | -51.21                  | -45.54                   | -9.13        | -16.26                     | -10.59                      |
| <b>Decoy7</b>  | -54.97    | -70.54                  | -62.22                   | -7.89        | -23.46                     | -15.14                      |
| <b>Decoy8</b>  | -50.56    | -66.32                  | -55.41                   | -9.47        | -25.23                     | -14.32                      |
| <b>Decoy9</b>  | -51.80    | -66.58                  | -55.71                   | -15.87       | -30.65                     | -19.78                      |
| <b>Decoy10</b> | -41.35    | -53.48                  | -44.72                   | -5.66        | -17.79                     | -23.45                      |
| <b>Rank</b>    | 2         | 1                       | 1                        | 1            | 1                          | 1                           |

Table S13(C)

| <b>3ZLR</b>    | <b>PB</b> | <b>GB<sup>HCT</sup></b> | <b>GB<sup>OBC1</sup></b> | <b>PB<sub>IE</sub></b> | <b>GB<sup>HCT</sup><sub>IE</sub></b> | <b>GB<sup>OBC1</sup><sub>IE</sub></b> |
|----------------|-----------|-------------------------|--------------------------|------------------------|--------------------------------------|---------------------------------------|
| <b>Native</b>  | -66.95    | -79.00                  | -67.60                   | -35.59                 | -47.64                               | -36.24                                |
| <b>Decoy1</b>  | -61.86    | -75.48                  | -65.09                   | -11.81                 | -25.43                               | -15.04                                |
| <b>Decoy2</b>  | -66.07    | -77.41                  | -67.38                   | -32.15                 | -43.49                               | -33.46                                |
| <b>Decoy3</b>  | -59.01    | -71.29                  | -62.89                   | -24.55                 | -36.83                               | -28.43                                |
| <b>Decoy4</b>  | -62.67    | -76.11                  | -66.39                   | -25.31                 | -38.75                               | -29.03                                |
| <b>Decoy5</b>  | -61.89    | -74.04                  | -64.22                   | -8.89                  | -21.04                               | -11.22                                |
| <b>Decoy6</b>  | -58.02    | -70.99                  | -61.65                   | -26.95                 | -39.92                               | -30.58                                |
| <b>Decoy7</b>  | -68.98    | -79.88                  | -70.22                   | -36.72                 | -47.62                               | -37.96                                |
| <b>Decoy8</b>  | -68.39    | -81.33                  | -70.34                   | -33.92                 | -46.86                               | -35.87                                |
| <b>Decoy9</b>  | -63.97    | -77.11                  | -66.71                   | -18.63                 | -31.77                               | -21.37                                |
| <b>Decoy10</b> | -59.62    | -72.18                  | -65.74                   | -34.33                 | -46.89                               | -40.45                                |
| <b>Rank</b>    | 3         | 3                       | 3                        | 2                      | 1                                    | 3                                     |

Table S13(D)

| <b>3ZK6</b>    | <b>PB</b> | <b>GB<sup>HCT</sup></b> | <b>GB<sup>OBC1</sup></b> | <b>PB<sub>IE</sub></b> | <b>GB<sup>HCT</sup><sub>IE</sub></b> | <b>GB<sup>OBC1</sup><sub>IE</sub></b> |
|----------------|-----------|-------------------------|--------------------------|------------------------|--------------------------------------|---------------------------------------|
| <b>Native</b>  | -46.03    | -55.13                  | -48.24                   | -35.07                 | -44.17                               | -37.28                                |
| <b>Decoy1</b>  | -44.42    | -53.23                  | -46.06                   | -33.58                 | -42.39                               | -35.22                                |
| <b>Decoy2</b>  | -45.95    | -56.14                  | -50.81                   | -33.90                 | -44.09                               | -38.76                                |
| <b>Decoy3</b>  | -41.79    | -51.40                  | -44.95                   | -28.22                 | -37.83                               | -31.38                                |
| <b>Decoy4</b>  | -45.79    | -55.07                  | -48.59                   | -29.35                 | -38.63                               | -32.15                                |
| <b>Decoy5</b>  | -41.81    | -50.99                  | -44.24                   | -29.22                 | -38.40                               | -31.65                                |
| <b>Decoy6</b>  | -44.91    | -53.59                  | -46.85                   | -34.22                 | -42.90                               | -36.16                                |
| <b>Decoy7</b>  | -44.07    | -56.21                  | -48.83                   | -30.52                 | -42.66                               | -35.28                                |
| <b>Decoy8</b>  | -47.05    | -57.18                  | -50.15                   | -32.42                 | -42.54                               | -35.51                                |
| <b>Decoy9</b>  | -48.96    | -59.99                  | -53.17                   | -31.04                 | -42.07                               | -35.25                                |
| <b>Decoy10</b> | -50.72    | -61.87                  | -54.63                   | -36.54                 | -47.69                               | -40.45                                |
| <b>Rank</b>    | 4         | 6                       | 7                        | 2                      | 2                                    | 3                                     |

Table S13(E)

| <b>600K</b>    | <b>PB</b> | <b>GB<sup>HCT</sup></b> | <b>GB<sup>OBC1</sup></b> | <b>PB<sub>IE</sub></b> | <b>GB<sup>HCT</sup><sub>IE</sub></b> | <b>GB<sup>OBC1</sup><sub>IE</sub></b> |
|----------------|-----------|-------------------------|--------------------------|------------------------|--------------------------------------|---------------------------------------|
| <b>Native</b>  | -45.40    | -72.23                  | -64.68                   | -23.35                 | -50.18                               | -42.63                                |
| <b>Decoy1</b>  | -45.93    | -54.32                  | -52.54                   | -8.05                  | -16.44                               | -14.66                                |
| <b>Decoy2</b>  | -48.82    | -55.71                  | -54.16                   | -4.06                  | -10.95                               | -9.40                                 |
| <b>Decoy3</b>  | -51.72    | -62.08                  | -54.33                   | -22.28                 | -32.64                               | -24.89                                |
| <b>Decoy4</b>  | -52.40    | -66.70                  | -59.70                   | -16.05                 | -30.35                               | -23.35                                |
| <b>Decoy5</b>  | -45.89    | -54.16                  | -45.84                   | -23.19                 | -31.46                               | -23.14                                |
| <b>Decoy6</b>  | -53.07    | -67.73                  | -63.54                   | -9.69                  | -24.35                               | -20.16                                |
| <b>Decoy7</b>  | -55.25    | -66.77                  | -62.91                   | -23.20                 | -34.72                               | -30.86                                |
| <b>Decoy8</b>  | -48.77    | -62.04                  | -58.26                   | -24.94                 | -38.21                               | -34.43                                |
| <b>Decoy9</b>  | -41.55    | -57.32                  | -55.20                   | -8.03                  | -23.80                               | -21.68                                |
| <b>Decoy10</b> | -42.16    | -51.69                  | -44.12                   | -21.49                 | -31.02                               | -23.45                                |
| <b>Rank</b>    | 9         | 1                       | 1                        | 2                      | 1                                    | 1                                     |

Table S13(F)

| <b>4AQ3</b>    | <b>PB</b> | <b>GB<sup>HCT</sup></b> | <b>GB<sup>OBC1</sup></b> | <b>PB<sub>IE</sub></b> | <b>GB<sup>HCT</sup><sub>IE</sub></b> | <b>GB<sup>OBC1</sup><sub>IE</sub></b> |
|----------------|-----------|-------------------------|--------------------------|------------------------|--------------------------------------|---------------------------------------|
| <b>Native</b>  | -46.90    | -56.88                  | -51.18                   | -35.01                 | -44.99                               | -39.29                                |
| <b>Decoy1</b>  | -45.26    | -52.10                  | -47.19                   | -32.30                 | -39.14                               | -34.23                                |
| <b>Decoy2</b>  | -40.73    | -49.74                  | -43.73                   | -25.34                 | -34.35                               | -28.34                                |
| <b>Decoy3</b>  | -47.86    | -56.33                  | -50.04                   | -30.32                 | -38.79                               | -32.50                                |
| <b>Decoy4</b>  | -45.37    | -53.09                  | -46.88                   | -32.08                 | -39.80                               | -33.59                                |
| <b>Decoy5</b>  | -44.32    | -52.22                  | -46.08                   | -27.94                 | -35.84                               | -29.70                                |
| <b>Decoy6</b>  | -46.27    | -58.14                  | -51.83                   | -28.10                 | -39.97                               | -33.66                                |
| <b>Decoy7</b>  | -51.44    | -60.00                  | -53.20                   | -36.57                 | -45.13                               | -38.33                                |
| <b>Decoy8</b>  | -40.79    | -47.70                  | -41.99                   | -27.26                 | -34.17                               | -28.46                                |
| <b>Decoy9</b>  | -47.10    | -54.52                  | -48.70                   | -35.09                 | -42.51                               | -36.69                                |
| <b>Decoy10</b> | -45.00    | -53.33                  | -46.76                   | -28.62                 | -36.95                               | -30.38                                |
| <b>Rank</b>    | 4         | 3                       | 3                        | 3                      | 2                                    | 1                                     |

Table S13(G)

| <b>6QGH</b>    | <b>PB</b> | <b>GB<sup>HCT</sup></b> | <b>GB<sup>OBC1</sup></b> | <b>PB<sub>IE</sub></b> | <b>GB<sup>HCT</sup><sub>IE</sub></b> | <b>GB<sup>OBC1</sup><sub>IE</sub></b> |
|----------------|-----------|-------------------------|--------------------------|------------------------|--------------------------------------|---------------------------------------|
| <b>Native</b>  | -47.89    | -68.27                  | -57.22                   | -37.26                 | -57.64                               | -46.59                                |
| <b>Decoy1</b>  | -48.21    | -61.92                  | -51.48                   | -35.87                 | -49.58                               | -39.14                                |
| <b>Decoy2</b>  | -57.83    | -68.11                  | -58.47                   | -41.64                 | -51.92                               | -42.28                                |
| <b>Decoy3</b>  | -51.15    | -61.87                  | -53.31                   | -30.49                 | -41.21                               | -32.65                                |
| <b>Decoy4</b>  | -51.22    | -60.66                  | -52.53                   | -33.56                 | -43.00                               | -34.87                                |
| <b>Decoy5</b>  | -51.41    | -58.03                  | -49.74                   | -35.51                 | -42.13                               | -33.84                                |
| <b>Decoy6</b>  | -48.39    | -58.99                  | -50.16                   | -33.66                 | -44.26                               | -35.43                                |
| <b>Decoy7</b>  | -55.23    | -66.44                  | -56.95                   | -36.50                 | -47.71                               | -38.22                                |
| <b>Decoy8</b>  | -42.74    | -50.29                  | -41.27                   | -25.07                 | -32.62                               | -23.60                                |
| <b>Decoy9</b>  | -55.08    | -62.56                  | -53.14                   | -40.69                 | -48.17                               | -38.75                                |
| <b>Decoy10</b> | -52.64    | -59.66                  | -50.23                   | -32.14                 | -39.16                               | -29.73                                |
| <b>Rank</b>    | 10        | 1                       | 2                        | 3                      | 1                                    | 1                                     |

Table S13(H)

| <b>6GL8</b>    | <b>PB</b> | <b>GB<sup>HCT</sup></b> | <b>GB<sup>OBC1</sup></b> | <b>PB<sub>IE</sub></b> | <b>GB<sup>HCT</sup><sub>IE</sub></b> | <b>GB<sup>OBC1</sup><sub>IE</sub></b> |
|----------------|-----------|-------------------------|--------------------------|------------------------|--------------------------------------|---------------------------------------|
| <b>Native</b>  | -36.06    | -41.28                  | -37.17                   | -28.99                 | -34.21                               | -30.10                                |
| <b>Decoy1</b>  | -38.00    | -41.85                  | -37.31                   | -29.83                 | -33.68                               | -29.14                                |
| <b>Decoy2</b>  | -36.17    | -40.73                  | -37.42                   | -28.51                 | -33.07                               | -29.76                                |
| <b>Decoy3</b>  | -34.62    | -38.72                  | -34.08                   | -25.96                 | -30.06                               | -25.42                                |
| <b>Decoy4</b>  | -33.43    | -39.45                  | -34.97                   | -26.44                 | -32.46                               | -27.98                                |
| <b>Decoy5</b>  | -40.11    | -45.67                  | -40.05                   | -24.75                 | -30.31                               | -24.69                                |
| <b>Decoy6</b>  | -37.90    | -42.36                  | -38.87                   | -27.76                 | -32.22                               | -28.73                                |
| <b>Decoy7</b>  | -36.45    | -41.77                  | -36.31                   | -23.26                 | -28.58                               | -23.12                                |
| <b>Decoy8</b>  | -34.34    | -40.98                  | -38.09                   | -26.16                 | -32.80                               | -29.91                                |
| <b>Decoy9</b>  | -36.99    | -40.78                  | -36.44                   | -27.76                 | -31.55                               | -27.21                                |
| <b>Decoy10</b> | -36.03    | -41.52                  | -36.98                   | -27.18                 | -32.67                               | -28.13                                |
| <b>Rank</b>    | 7         | 6                       | 6                        | 2                      | 1                                    | 1                                     |

Table S13(I)

| <b>6000</b>    | <b>PB</b> | <b>GB<sup>HCT</sup></b> | <b>GB<sup>OBC1</sup></b> | <b>PB_IE</b> | <b>GB<sup>HCT</sup>_IE</b> | <b>GB<sup>OBC1</sup>_IE</b> |
|----------------|-----------|-------------------------|--------------------------|--------------|----------------------------|-----------------------------|
| <b>Native</b>  | -35.39    | -43.17                  | -38.71                   | -25.22       | -33.00                     | -28.54                      |
| <b>Decoy1</b>  | -21.54    | -27.00                  | -23.09                   | -8.80        | -14.26                     | -10.35                      |
| <b>Decoy2</b>  | -20.84    | -21.17                  | -20.12                   | -10.90       | -11.23                     | -10.18                      |
| <b>Decoy3</b>  | -18.41    | -23.36                  | -20.13                   | -3.61        | -8.56                      | -5.33                       |
| <b>Decoy4</b>  | -26.04    | -27.39                  | -24.79                   | -6.48        | -7.83                      | -5.23                       |
| <b>Decoy5</b>  | -25.64    | -29.93                  | -27.26                   | -3.77        | -8.06                      | -5.39                       |
| <b>Decoy6</b>  | -36.35    | -42.05                  | -38.76                   | -25.04       | -30.74                     | -27.45                      |
| <b>Decoy7</b>  | -27.67    | -31.46                  | -30.09                   | -9.70        | -13.49                     | -23.18                      |
| <b>Decoy8</b>  | -30.02    | -32.10                  | -30.46                   | -18.76       | -20.84                     | -19.20                      |
| <b>Decoy9</b>  | -20.41    | -26.71                  | -23.70                   | -9.68        | -15.98                     | -12.97                      |
| <b>Decoy10</b> | -22.75    | -23.80                  | -22.48                   | -7.95        | -9.00                      | -7.68                       |
| <b>Rank</b>    | 2         | 1                       | 2                        | 1            | 1                          | 1                           |

Table S13(J)

| <b>4CIN</b>    | <b>PB</b> | <b>GB<sup>HCT</sup></b> | <b>GB<sup>OBC1</sup></b> | <b>PB_IE</b> | <b>GB<sup>HCT</sup>_IE</b> | <b>GB<sup>OBC1</sup>_IE</b> |
|----------------|-----------|-------------------------|--------------------------|--------------|----------------------------|-----------------------------|
| <b>Native</b>  | -89.67    | -109.82                 | -93.06                   | -32.04       | -52.19                     | -52.19                      |
| <b>Decoy1</b>  | -102.50   | -121.68                 | -98.14                   | -31.06       | -50.24                     | -50.24                      |
| <b>Decoy2</b>  | -92.67    | -114.70                 | -92.70                   | -16.48       | -38.51                     | -38.51                      |
| <b>Decoy3</b>  | -95.36    | -106.32                 | -89.54                   | -29.36       | -40.32                     | -40.32                      |
| <b>Decoy4</b>  | -97.68    | -122.93                 | -92.03                   | -19.80       | -45.05                     | -45.05                      |
| <b>Decoy5</b>  | -83.94    | -109.14                 | -90.95                   | -16.91       | -42.11                     | -42.11                      |
| <b>Decoy6</b>  | -82.19    | -91.66                  | -75.94                   | -11.13       | -20.60                     | -20.60                      |
| <b>Decoy7</b>  | -66.04    | -84.52                  | -68.46                   | -6.84        | -25.32                     | -25.32                      |
| <b>Decoy8</b>  | -91.29    | -114.77                 | -93.19                   | -28.69       | -52.17                     | -52.17                      |
| <b>Decoy9</b>  | -87.54    | -104.29                 | -84.47                   | -10.91       | -27.66                     | -27.66                      |
| <b>Decoy10</b> | -88.22    | -105.11                 | -88.44                   | -12.30       | -29.19                     | -29.19                      |
| <b>Rank</b>    | 6         | 5                       | 3                        | 1            | 1                          | 1                           |

Table S13(K)

| <b>1G5J</b>    | <b>PB</b> | <b>GB<sup>HCT</sup></b> | <b>GB<sup>OBC1</sup></b> | <b>PB_IE</b> | <b>GB<sup>HCT</sup>_IE</b> | <b>GB<sup>OBC1</sup>_IE</b> |
|----------------|-----------|-------------------------|--------------------------|--------------|----------------------------|-----------------------------|
| <b>Native</b>  | -93.53    | -121.90                 | -98.97                   | -24.13       | -52.50                     | -29.57                      |
| <b>Decoy1</b>  | -101.83   | -125.16                 | -100.75                  | -9.70        | -33.03                     | -8.62                       |
| <b>Decoy2</b>  | -112.20   | -142.48                 | -115.59                  | -21.31       | -51.59                     | -24.70                      |
| <b>Decoy3</b>  | -90.62    | -109.65                 | -96.89                   | -12.34       | -31.37                     | -18.61                      |
| <b>Decoy4</b>  | -95.24    | -115.43                 | -96.84                   | -23.75       | -43.94                     | -25.35                      |
| <b>Decoy5</b>  | -129.27   | -149.50                 | -124.11                  | -15.11       | -35.34                     | -9.95                       |
| <b>Decoy6</b>  | -105.86   | -124.91                 | -105.50                  | -17.96       | -37.01                     | -17.60                      |
| <b>Decoy7</b>  | -117.26   | -141.57                 | -116.17                  | -22.18       | -46.49                     | -21.09                      |
| <b>Decoy8</b>  | -117.52   | -149.42                 | -122.98                  | -24.49       | -56.39                     | -29.95                      |
| <b>Decoy9</b>  | -78.33    | -104.94                 | -85.25                   | -17.77       | -44.38                     | -24.69                      |
| <b>Decoy10</b> | -134.74   | -159.28                 | -129.72                  | -19.22       | -43.76                     | -14.20                      |
| <b>Rank</b>    | 9         | 8                       | 8                        | 2            | 2                          | 2                           |

Table S13(L)

| <b>2XA0</b>    | <b>PB</b> | <b>GB<sup>HCT</sup></b> | <b>GB<sup>OBC1</sup></b> | <b>PB<sub>IE</sub></b> | <b>GB<sup>HCT</sup><sub>IE</sub></b> | <b>GB<sup>OBC1</sup><sub>IE</sub></b> |
|----------------|-----------|-------------------------|--------------------------|------------------------|--------------------------------------|---------------------------------------|
| <b>Native</b>  | -122.07   | -139.84                 | -118.19                  | -23.77                 | -41.54                               | -19.89                                |
| <b>Decoy1</b>  | -110.30   | -124.36                 | -100.75                  | -17.05                 | -31.11                               | -7.50                                 |
| <b>Decoy2</b>  | -101.82   | -126.87                 | -105.32                  | -5.75                  | -30.80                               | -9.25                                 |
| <b>Decoy3</b>  | -100.40   | -115.11                 | -91.33                   | -17.90                 | -32.60                               | -8.82                                 |
| <b>Decoy4</b>  | -112.42   | -133.04                 | -103.08                  | -13.65                 | -34.27                               | -4.31                                 |
| <b>Decoy5</b>  | -106.25   | -126.91                 | -101.99                  | -14.20                 | -34.86                               | -9.94                                 |
| <b>Decoy6</b>  | -90.46    | -114.09                 | -92.59                   | -4.53                  | -28.16                               | -6.66                                 |
| <b>Decoy7</b>  | -117.78   | -138.07                 | -108.32                  | -19.56                 | -39.85                               | -10.10                                |
| <b>Decoy8</b>  | -101.16   | -117.84                 | -94.48                   | -12.36                 | -29.04                               | -5.68                                 |
| <b>Decoy9</b>  | -92.83    | -110.15                 | -84.46                   | -15.19                 | -32.51                               | -6.82                                 |
| <b>Decoy10</b> | -115.51   | -142.25                 | -116.21                  | -9.73                  | -36.47                               | -10.43                                |
| <b>Rank</b>    | 1         | 2                       | 1                        | 1                      | 1                                    | 1                                     |

Table S13(M)

| <b>3R85</b>    | <b>PB</b> | <b>GB<sup>HCT</sup></b> | <b>GB<sup>OBC1</sup></b> | <b>PB<sub>IE</sub></b> | <b>GB<sup>HCT</sup><sub>IE</sub></b> | <b>GB<sup>OBC1</sup><sub>IE</sub></b> |
|----------------|-----------|-------------------------|--------------------------|------------------------|--------------------------------------|---------------------------------------|
| <b>Native</b>  | -90.30    | -107.12                 | -90.64                   | -21.93                 | -38.75                               | -22.27                                |
| <b>Decoy1</b>  | -119.68   | -143.11                 | -114.83                  | -11.58                 | -35.01                               | -6.73                                 |
| <b>Decoy2</b>  | -77.79    | -89.19                  | -73.97                   | -7.84                  | -19.24                               | -4.02                                 |
| <b>Decoy3</b>  | -58.76    | -71.96                  | -57.13                   | -10.36                 | -23.56                               | -8.73                                 |
| <b>Decoy4</b>  | -109.49   | -127.18                 | -108.15                  | -14.65                 | -32.34                               | -13.31                                |
| <b>Decoy5</b>  | -76.31    | -89.48                  | -72.81                   | -7.88                  | -21.05                               | -4.38                                 |
| <b>Decoy6</b>  | -83.59    | -90.94                  | -76.41                   | -11.90                 | -19.25                               | -4.72                                 |
| <b>Decoy7</b>  | -80.79    | -95.42                  | -79.32                   | -17.29                 | -31.92                               | -15.82                                |
| <b>Decoy8</b>  | -79.13    | -94.39                  | -76.73                   | -11.24                 | -26.50                               | -8.84                                 |
| <b>Decoy9</b>  | -76.27    | -90.74                  | -74.80                   | -19.75                 | -34.22                               | -18.28                                |
| <b>Decoy10</b> | -72.79    | -86.47                  | -72.33                   | -4.70                  | -18.38                               | -4.24                                 |
| <b>Rank</b>    | 3         | 3                       | 3                        | 1                      | 1                                    | 1                                     |

Table S13(N)

| <b>3PL7</b>    | <b>PB</b> | <b>GB<sup>HCT</sup></b> | <b>GB<sup>OBC1</sup></b> | <b>PB<sub>IE</sub></b> | <b>GB<sup>HCT</sup><sub>IE</sub></b> | <b>GB<sup>OBC1</sup><sub>IE</sub></b> |
|----------------|-----------|-------------------------|--------------------------|------------------------|--------------------------------------|---------------------------------------|
| <b>Native</b>  | -79.34    | -96.13                  | -80.52                   | -17.45                 | -34.24                               | -18.63                                |
| <b>Decoy1</b>  | -75.51    | -89.19                  | -72.80                   | -8.46                  | -22.14                               | -5.75                                 |
| <b>Decoy2</b>  | -85.19    | -90.59                  | -74.72                   | -22.72                 | -28.12                               | -12.25                                |
| <b>Decoy3</b>  | -85.42    | -101.31                 | -80.77                   | -9.02                  | -24.91                               | -4.37                                 |
| <b>Decoy4</b>  | -77.15    | -100.96                 | -79.67                   | -4.29                  | -28.10                               | -6.81                                 |
| <b>Decoy5</b>  | -79.76    | -94.38                  | -77.74                   | -7.18                  | -21.80                               | -5.16                                 |
| <b>Decoy6</b>  | -102.23   | -130.11                 | -102.60                  | -5.71                  | -33.59                               | -6.08                                 |
| <b>Decoy7</b>  | -92.86    | -104.02                 | -87.99                   | -6.94                  | -18.10                               | -25.05                                |
| <b>Decoy8</b>  | -78.94    | -95.93                  | -74.58                   | -12.88                 | -29.87                               | -8.52                                 |
| <b>Decoy9</b>  | -94.57    | -136.16                 | -106.45                  | -18.19                 | -59.78                               | -30.07                                |
| <b>Decoy10</b> | -79.59    | -87.67                  | -73.35                   | -17.14                 | -25.22                               | -10.90                                |
| <b>Rank</b>    | 8         | 6                       | 5                        | 3                      | 2                                    | 3                                     |

Table S13(O)

| <b>2PON</b>    | <b>PB</b> | <b>GB<sup>HCT</sup></b> | <b>GB<sup>OBC1</sup></b> | <b>PB_IE</b> | <b>GB<sup>HCT</sup>_IE</b> | <b>GB<sup>OBC1</sup>_IE</b> |
|----------------|-----------|-------------------------|--------------------------|--------------|----------------------------|-----------------------------|
| <b>Native</b>  | -88.32    | -104.55                 | -85.87                   | -20.60       | -36.83                     | -18.15                      |
| <b>Decoy1</b>  | -88.28    | -104.80                 | -84.55                   | -19.52       | -36.04                     | -15.79                      |
| <b>Decoy2</b>  | -115.55   | -140.13                 | -113.71                  | -26.50       | -51.08                     | -24.66                      |
| <b>Decoy3</b>  | -98.96    | -122.35                 | -99.65                   | -10.39       | -33.78                     | -11.08                      |
| <b>Decoy4</b>  | -104.31   | -125.49                 | -105.39                  | -6.25        | -27.43                     | -7.33                       |
| <b>Decoy5</b>  | -80.71    | -104.00                 | -82.10                   | -5.85        | -29.14                     | -7.24                       |
| <b>Decoy6</b>  | -84.35    | -115.09                 | -93.95                   | -5.69        | -36.43                     | -15.29                      |
| <b>Decoy7</b>  | -84.56    | -100.80                 | -73.92                   | -18.99       | -35.23                     | -8.35                       |
| <b>Decoy8</b>  | -81.22    | -95.03                  | -79.12                   | -6.58        | -20.39                     | -4.48                       |
| <b>Decoy9</b>  | -68.97    | -86.58                  | -68.29                   | -12.47       | -30.08                     | -11.79                      |
| <b>Decoy10</b> | -89.89    | -99.97                  | -77.90                   | -21.40       | -31.48                     | -9.41                       |
| <b>Rank</b>    | 5         | 6                       | 5                        | 3            | 2                          | 2                           |

Table S13(P)

**Figure**

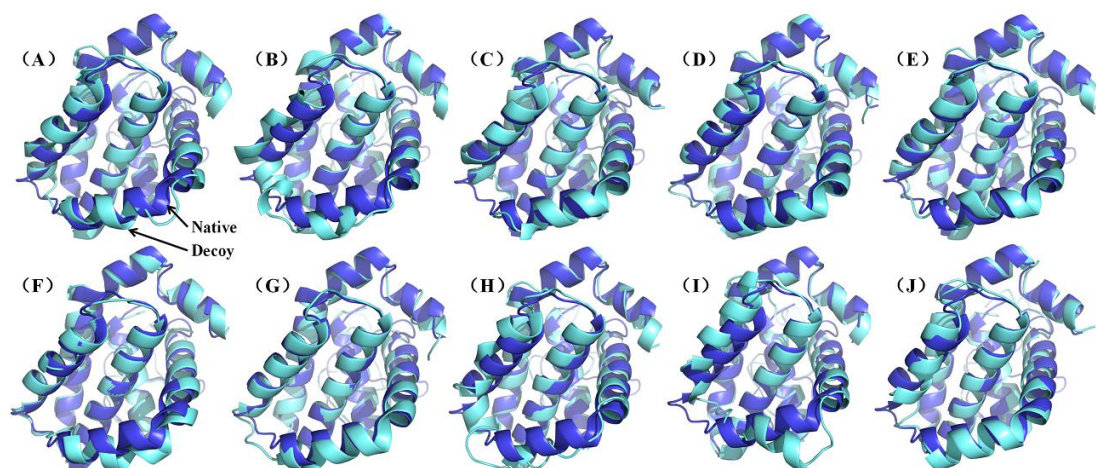

**Figure S1** The structure comparison of protein between native structure and 10 decoys of 4AQ3 system.

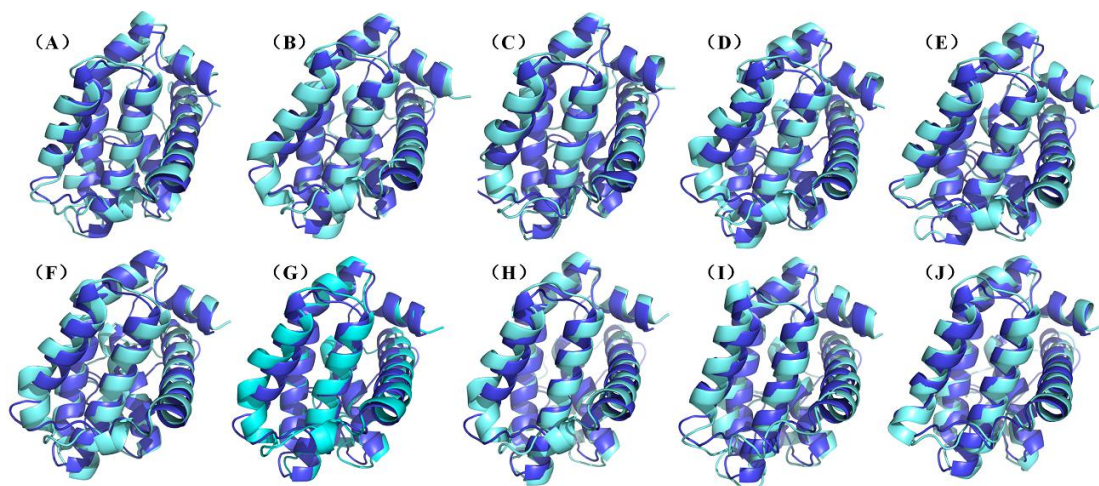

**Figure S2** The structure comparison of protein between native structure and 10 decoys of 2PON system.

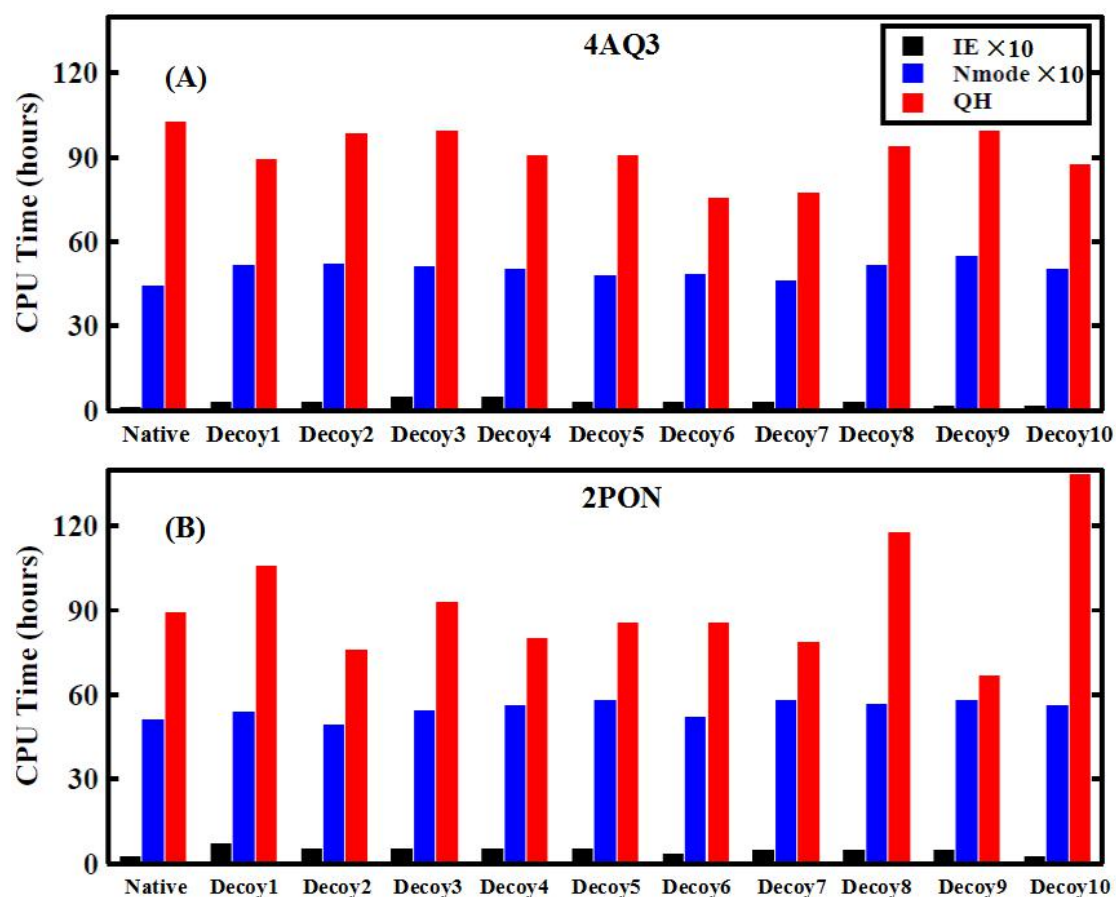

**Figure S3** Computation cost (core hours) of IE, Nmode, and QH methods to calculate entropic contribution for 100 000, 30, and 30 configurations (snapshots) of the native and decoy structures of 4AQ3 and 2PON systems, respectively. The  $\times 10$  in the table represents that the required time of IE and Nmode methods are multiplied by a factor of 10 before they were plotted.



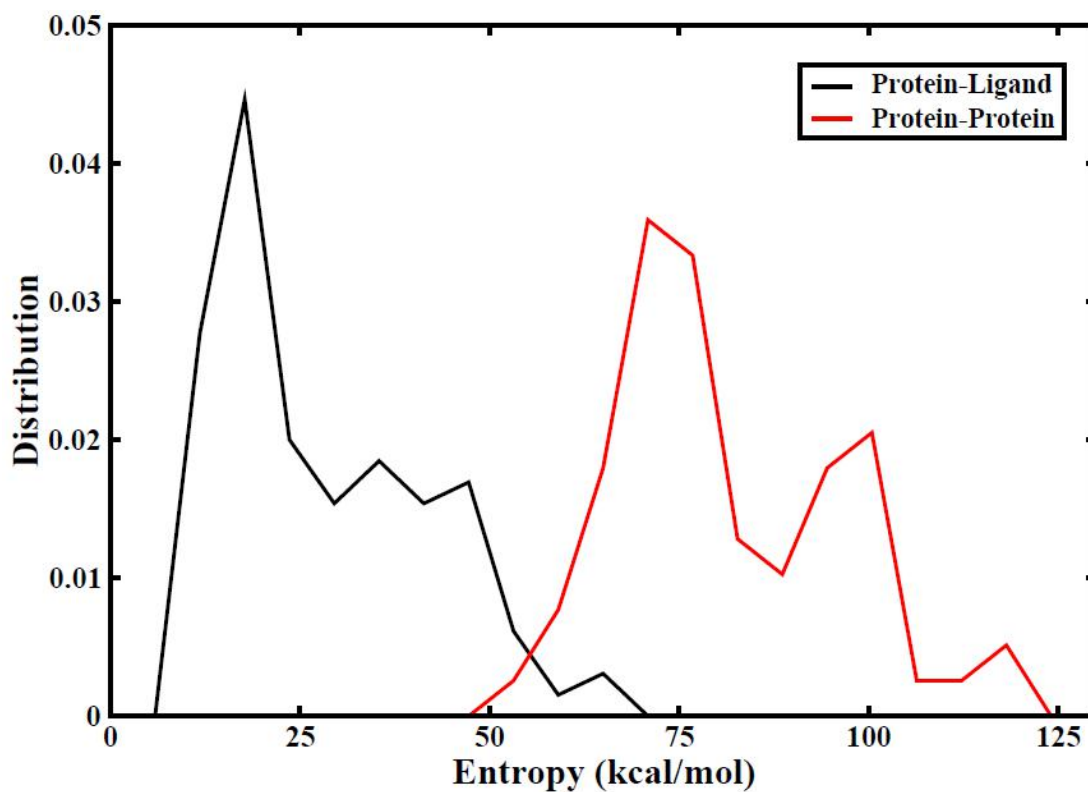

**Figure S4** The distribution of entropic contribution for all native and decoy structures of protein-ligand and protein-protein systems calculated by IE method.

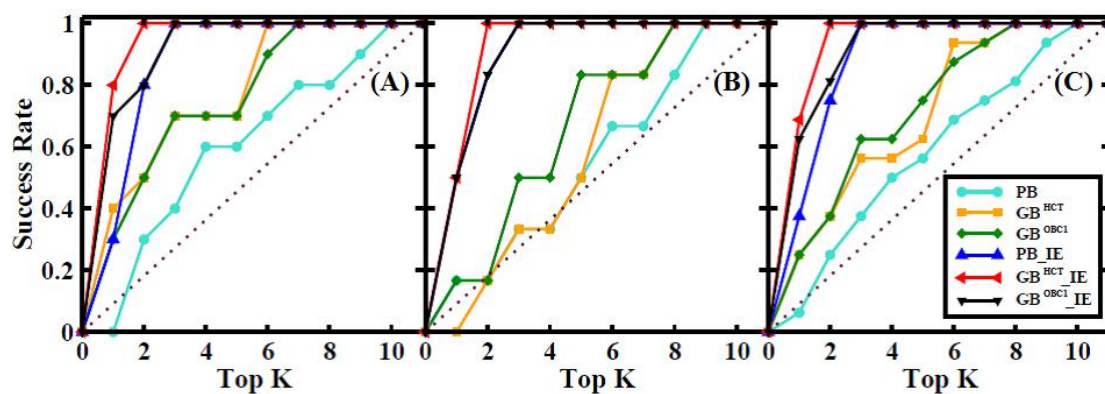

**Figure S5** The success-rate curves (the proportion of the case in which the native structure could be found in the top K predictions) of (A) the 10 protein-ligand systems, (B) the 6 protein-protein systems and (C) all the 16 systems.

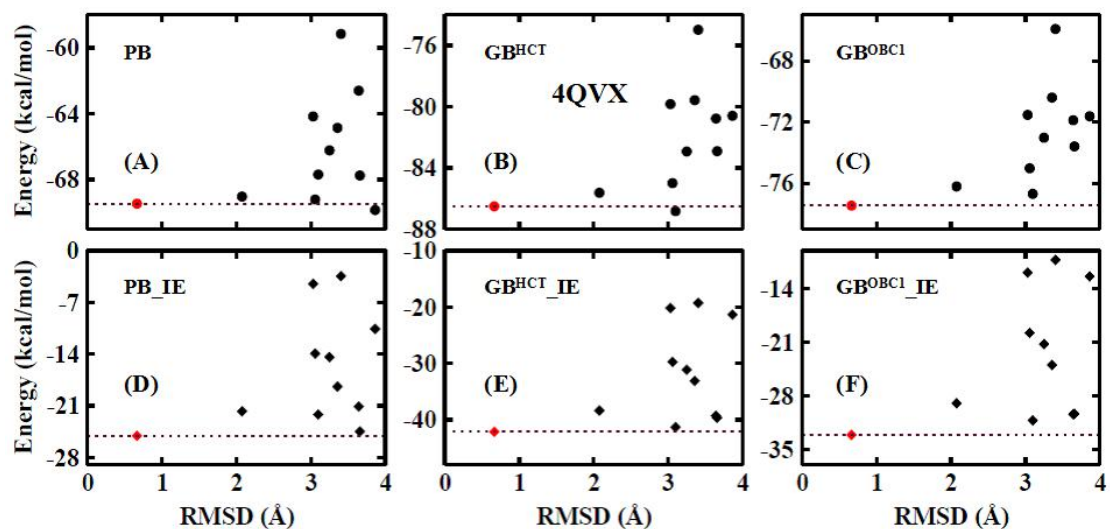

**Figure S6** The binding free energy plotted against the average RMSD value of protein backbone responding to the initial native structure during the MD simulation of six methods for 4QVX system.

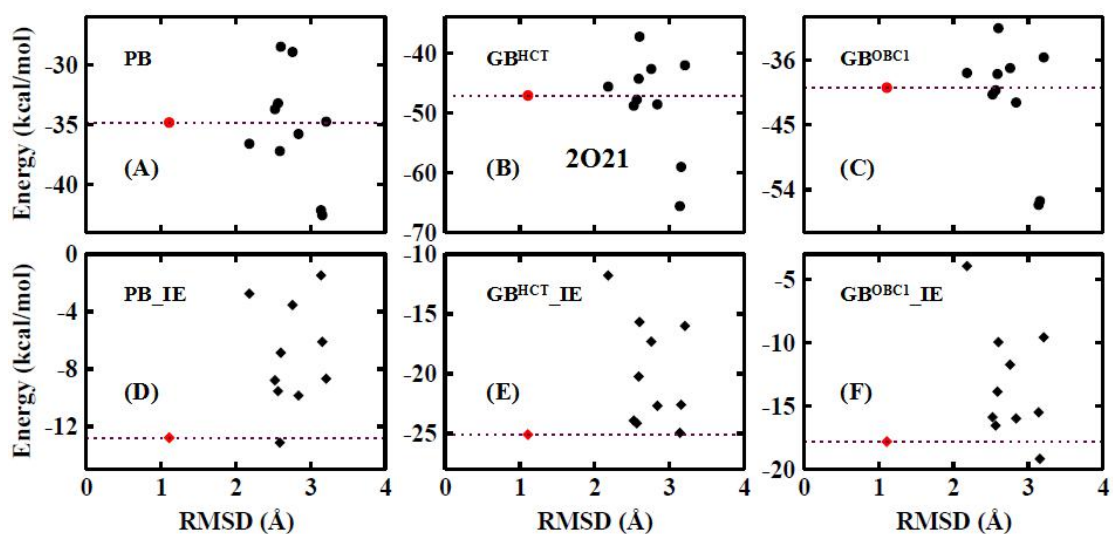

**Figure S7** The same as Figure S6, but for 2O21 system.

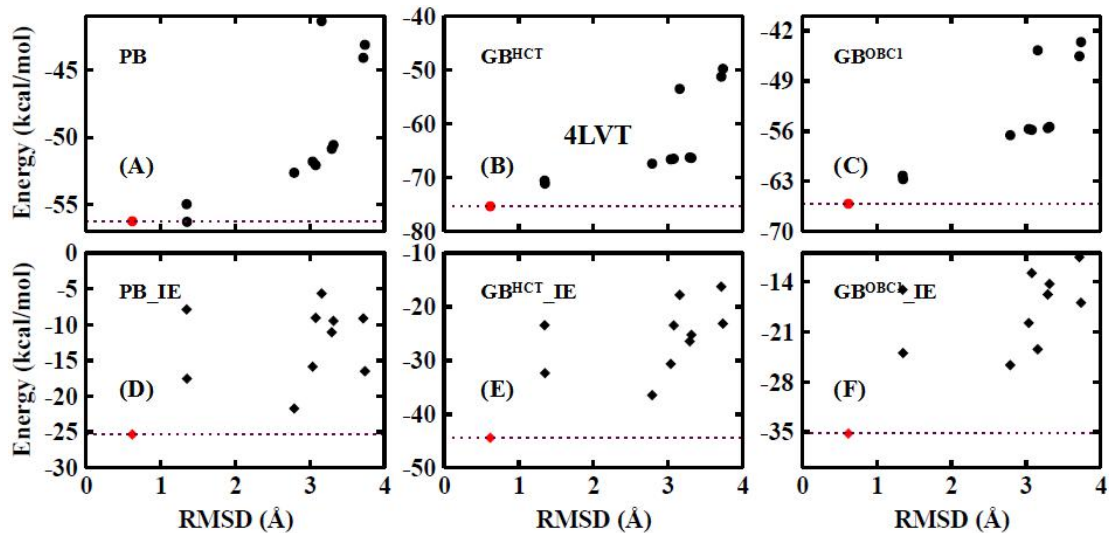

**Figure S8** The same as Figure S6, but for 4LVT system.

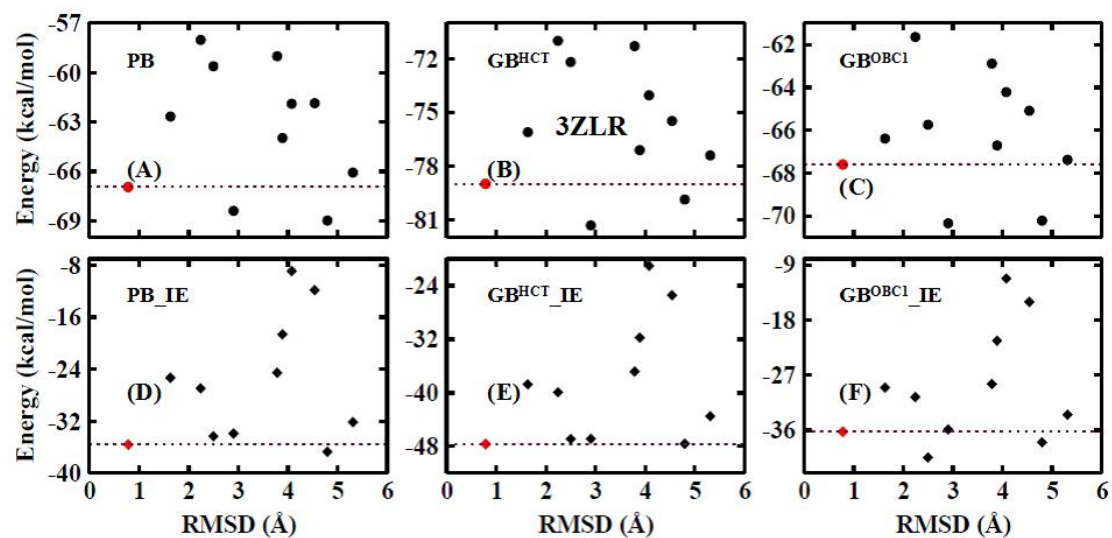

**Figure S9** The same as Figure S6, but for 3ZLR system.

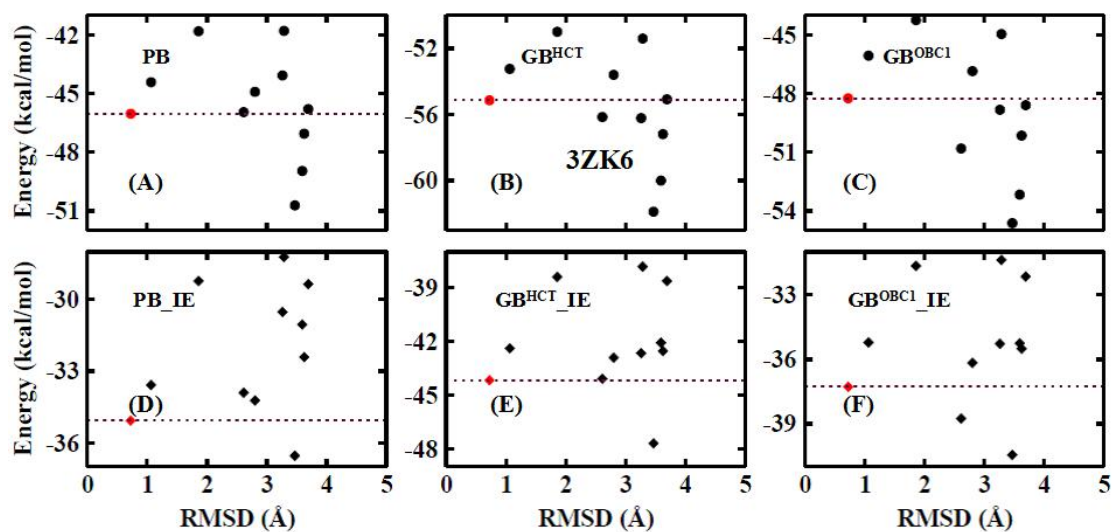

**Figure S10** The same as Figure S6, but for 3ZK6 system.

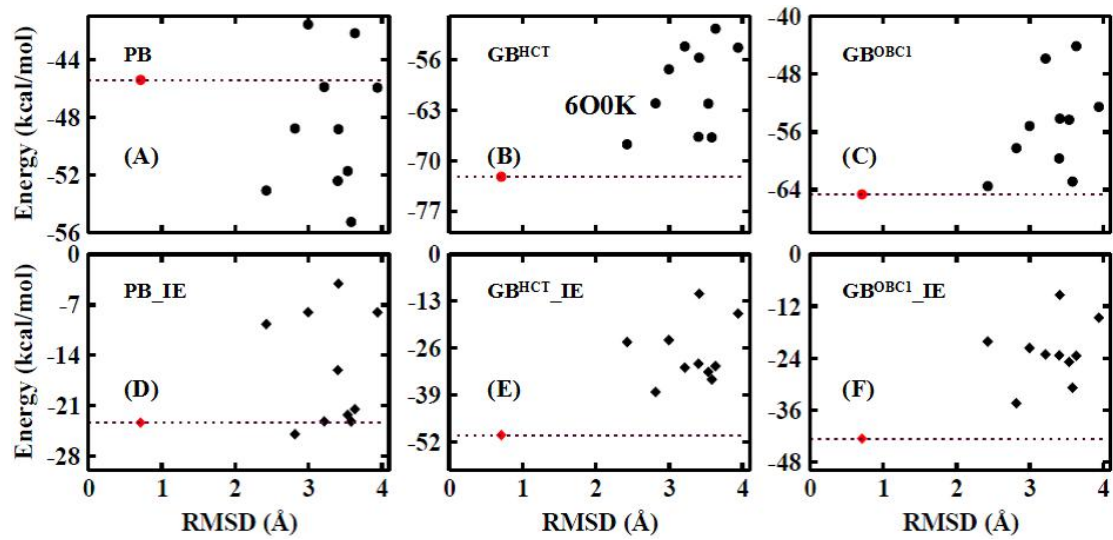

Figure S11 The same as Figure S6, but for 600K system.

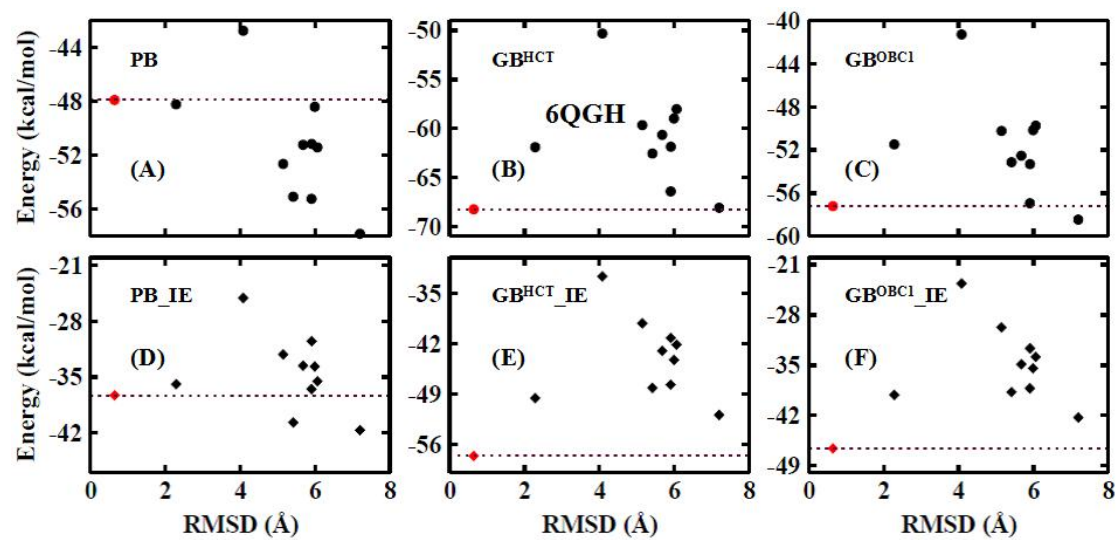

Figure S12 The same as Figure S6, but for 6QGH system.

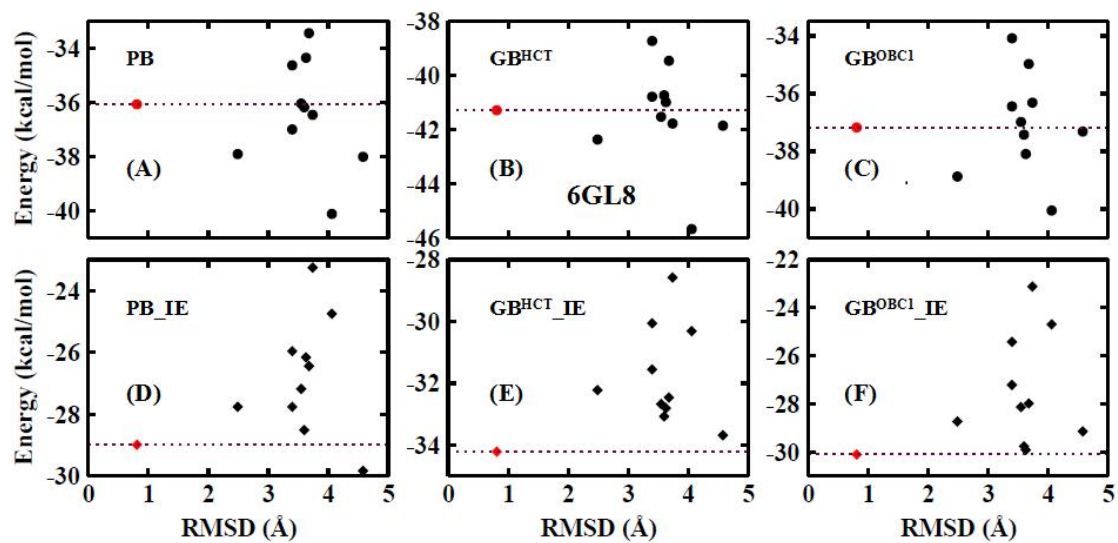

Figure S13 The same as Figure S6, but for 6GL8 system.



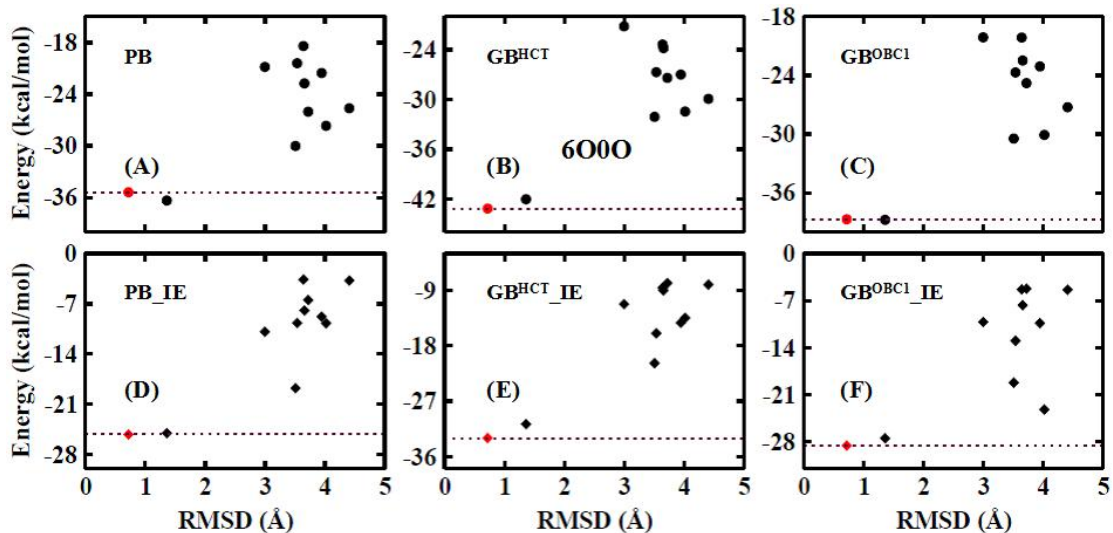

Figure S14 The same as Figure S6, but for 6000 system.

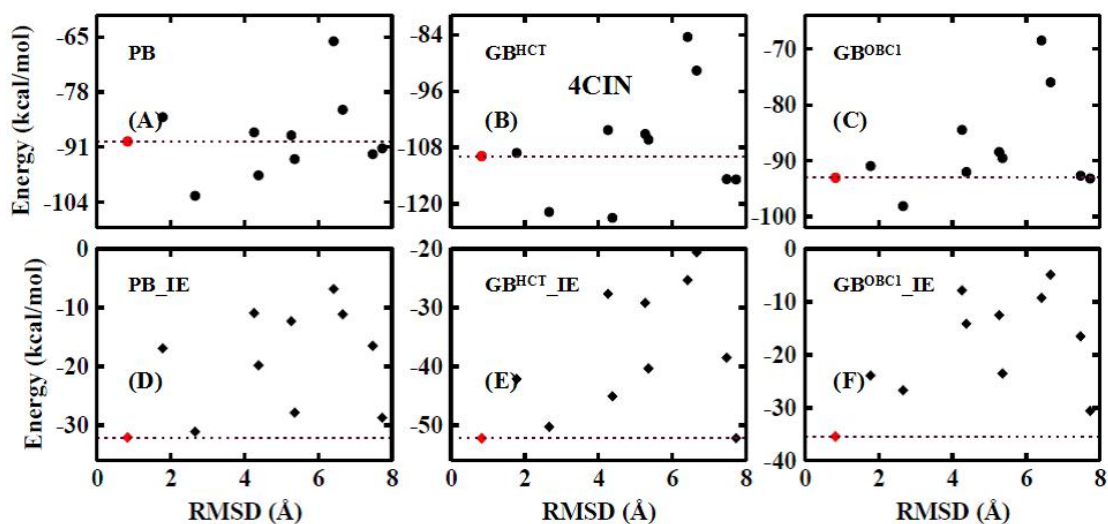

Figure S15 The same as Figure S6, but for 4CIN system.

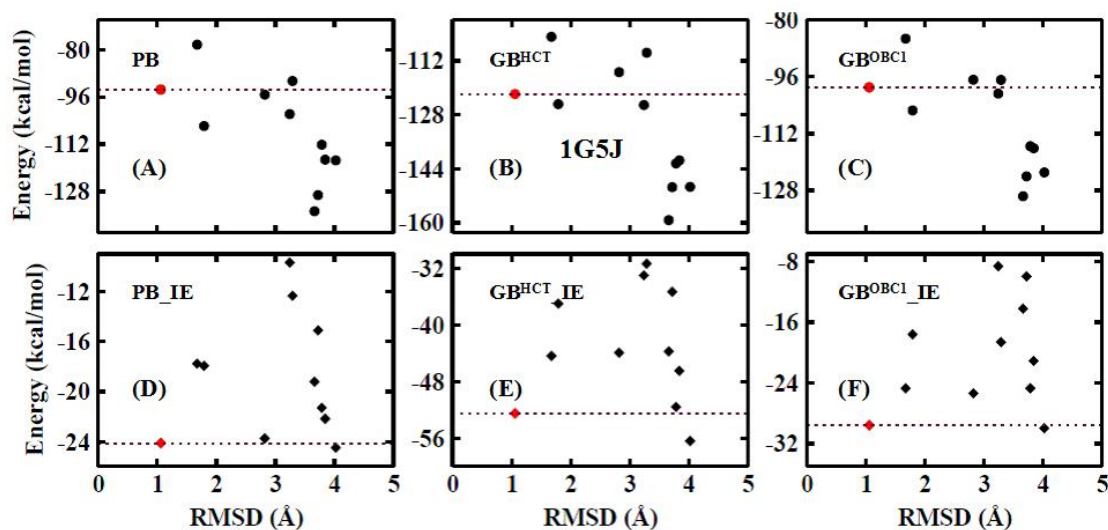

Figure S16 The same as Figure S6, but for 1G5J system.

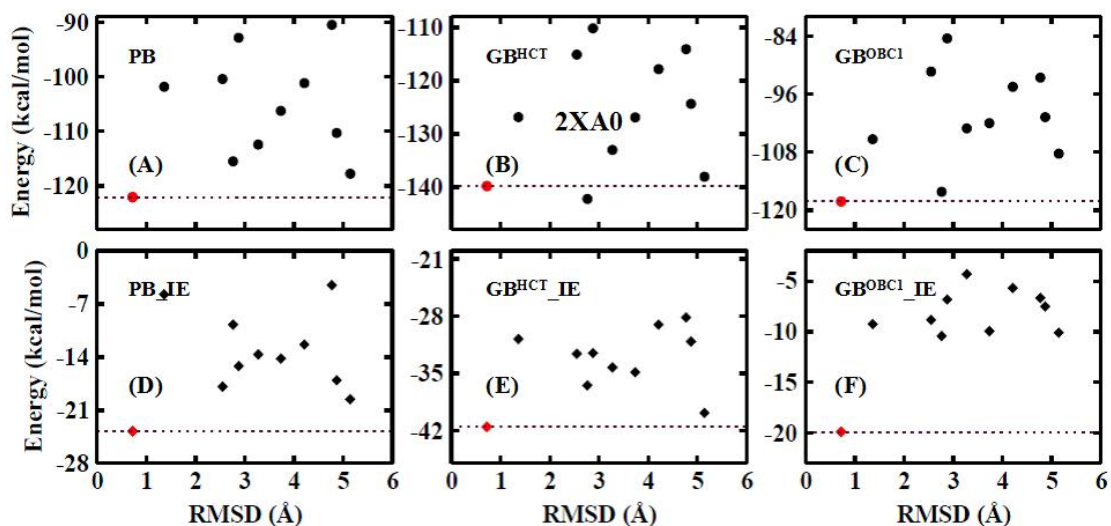

Figure S17 The same as Figure S6, but for 2XA0 system.

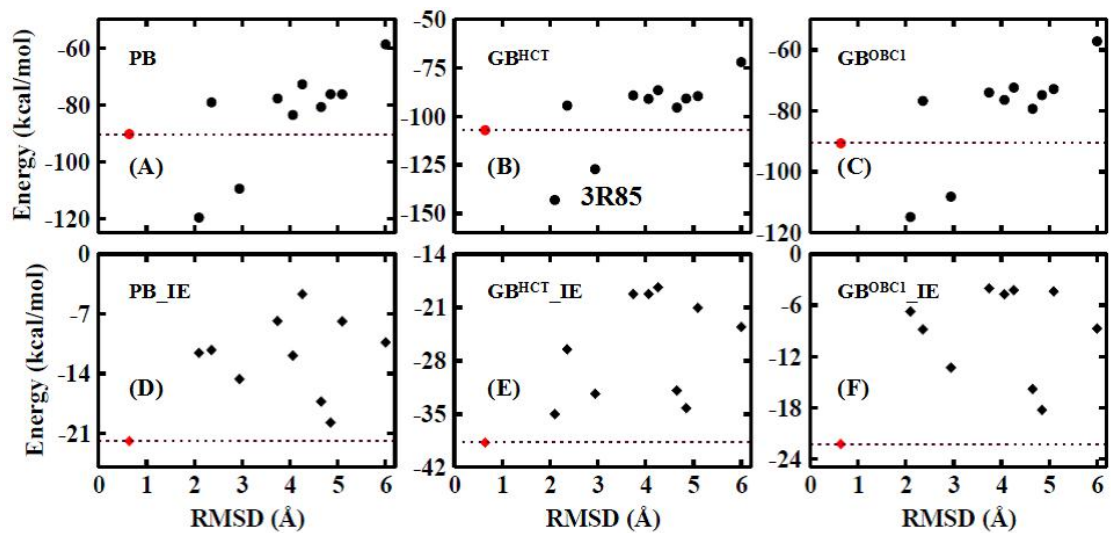

Figure S18 The same as Figure S6, but for 3R85 system.

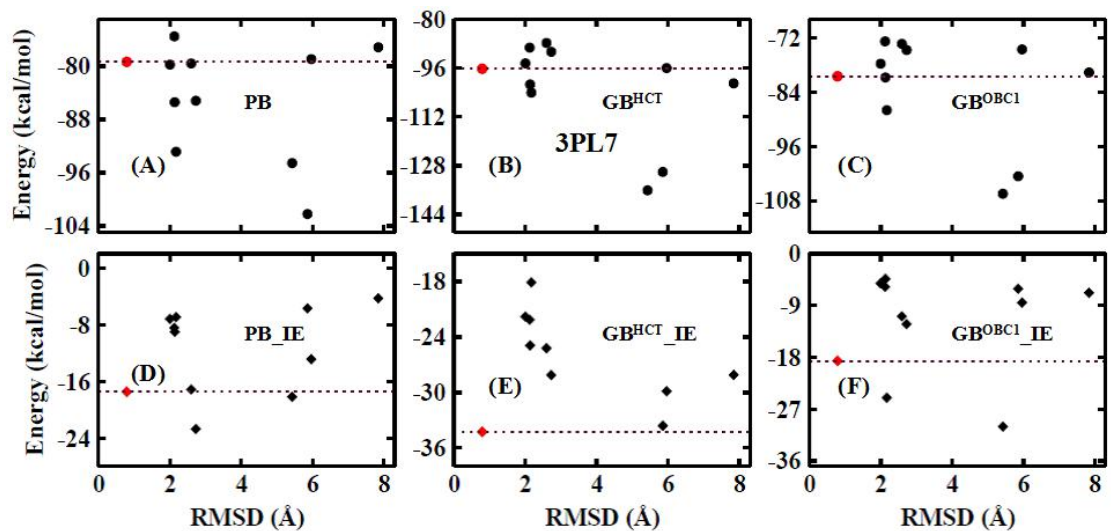

Figure S19 The same as Figure S6, but for 3PL7 system.
